# Supplementary material for: Combining ability, heterosis and performance of grain yield and content of Fe, Zn and protein in bread wheat under normal and late sowing conditions
Source: PeerJ. 2023 Mar 9;11:e14971. doi: 10.7717/peerj.14971 (PMC10008312; doi:10.7717/peerj.14971)
Supplement: Supplemental Information 2 [file peerj-11-14971-s002.xlsx]

## Sheet: SE OF GCA
									SE of GCA	E1
								1	0.04	0.2	0.2
								2	0.061	0.246982	0.246982
								3	0.3	0.547723	0.547723
								4	0.025	0.158114	0.158114
								5	0.013	0.114018	0.114018
								6	0.026	0.161245	0.161245
								7	0.23	0.479583	0.479583
								8	0.00062	0.0248998	0.0248998
								9	0.041	0.202485	0.202485
								10	0.059	0.242899	0.242899
								11	0.22	0.469042	0.469042
								12	0.53	0.728011	0.728011
								13	0.0034	0.0583095	0.0583095
								14	0.05	0.223607	0.223607
								15	0.033	0.181659	0.181659
								16	0.015	0.122474	0.122474
								17	0.05	0.223607	0.223607
								18	0.0072	0.0848528	0.0848528

## Sheet: Parents Significant NS
				SE	0.29			SE	0.32
			grain yield per plant
		E1	0.01	0.05	sign	final	E2	0.01	0.05	sign	final
		3.06	0.5684	0.7482	**	**	2.17	0.6272	0.8256	**	**
		-1.17	0.5684	0.7482	NS	**	-0.35	0.6272	0.8256	NS	NS
		2.1	0.5684	0.7482	**	**	1.02	0.6272	0.8256	**	**
		2.39	0.5684	0.7482	**	**	-0.41	0.6272	0.8256	NS	NS
		-0.42	0.5684	0.7482	NS	NS	0.75	0.6272	0.8256	*	*
		1.29	0.5684	0.7482	**	**	0.05	0.6272	0.8256	NS	NS
		-2.14	0.5684	0.7482	NS	**	-2.01	0.6272	0.8256	NS	**
		-1.12	0.5684	0.7482	NS	**	-2.59	0.6272	0.8256	NS	**
		-1.7	0.5684	0.7482	NS	**	1.35	0.6272	0.8256	**	**
		-2.28	0.5684	0.7482	NS	**	0.02	0.6272	0.8256	NS	NS
				SE	0.02			SE	0.06
			protein content
		E1	0.01	0.05	sign	final	E2	0.01	0.05	sign	final
		-0.42	0.0392	0.0516	NS	**	0.16	0.1176	0.1548	**	**
		-0.1	0.0392	0.0516	NS	**	-0.04	0.1176	0.1548	NS	NS
		0.2	0.0392	0.0516	**	**	0.2	0.1176	0.1548	**	**
		0.27	0.0392	0.0516	**	**	-0.12	0.1176	0.1548	NS	*
		-0.16	0.0392	0.0516	NS	**	-0.11	0.1176	0.1548	NS	NS
		0	0.0392	0.0516	NS	NS	0.13	0.1176	0.1548	*	*
		0.29	0.0392	0.0516	**	**	0.11	0.1176	0.1548	NS	NS
		0.04	0.0392	0.0516	*	*	0	0.1176	0.1548	NS	NS
		0.14	0.0392	0.0516	**	**	-0.07	0.1176	0.1548	NS	NS
		-0.25	0.0392	0.0516	NS	**	-0.26	0.1176	0.1548	NS	**
				SE	0.12			SE	0.15
			iron
		E1	0.01	0.05	sign	final	E2	0.01	0.05	sign	final
		-1.05	0.2352	0.3096	NS	**	1.03	0.294	0.387	**	**
		0.83	0.2352	0.3096	**	**	-1.03	0.294	0.387	NS	**
		0.07	0.2352	0.3096	NS	NS	-1.2	0.294	0.387	NS	**
		-0.62	0.2352	0.3096	NS	**	-0.59	0.294	0.387	NS	**
		-1.19	0.2352	0.3096	NS	**	-0.13	0.294	0.387	NS	NS
		0.21	0.2352	0.3096	NS	NS	0.7	0.294	0.387	**	**
		1.79	0.2352	0.3096	**	**	0.7	0.294	0.387	**	**
		0.08	0.2352	0.3096	NS	NS	0.33	0.294	0.387	*	*
		0.67	0.2352	0.3096	**	**	0.09	0.294	0.387	NS	NS
		-0.78	0.2352	0.3096	NS	**	0.11	0.294	0.387	NS	NS
				SE	0.06			SE	0.07
			zinc
		E1	0.01	0.05	sign	final	E2	0.01	0.05	sign	final
		-0.63	0.1176	0.1548	NS	**	-0.12	0.1372	0.1806	NS	NS
		-0.18	0.1176	0.1548	NS	*	-0.34	0.1372	0.1806	NS	**
		-0.28	0.1176	0.1548	NS	**	-0.55	0.1372	0.1806	NS	**
		-0.2	0.1176	0.1548	NS	**	-0.05	0.1372	0.1806	NS	NS
		-0.33	0.1176	0.1548	NS	**	0.23	0.1372	0.1806	**	**
		0.7	0.1176	0.1548	**	**	-0.61	0.1372	0.1806	NS	**
		1.19	0.1176	0.1548	**	**	0.66	0.1372	0.1806	**	**
		-0.14	0.1176	0.1548	NS	*	-0.27	0.1372	0.1806	NS	**
		0.07	0.1176	0.1548	NS	NS	0.39	0.1372	0.1806	**	**
		-0.21	0.1176	0.1548	NS	**	0.65	0.1372	0.1806	**	**

## Sheet: hybrids significant NS
					SE	0.96			SE	1.09
		grain yield per plant
		E1	0.01	0.05	sign	final	E2	0.01	0.05	sign	final
	1	1.33	1.8816	2.4768	NS	NS	-4.29	2.1364	2.8122	NS	**
	2	7.95	1.8816	2.4768	**	**	-1.51	2.1364	2.8122	NS	NS
	3	10.73	1.8816	2.4768	**	**	2.71	2.1364	2.8122	*	*
	4	-3.56	1.8816	2.4768	NS	**	-5.03	2.1364	2.8122	NS	**
	5	-0.65	1.8816	2.4768	NS	NS	-2.61	2.1364	2.8122	NS	*
	6	5.29	1.8816	2.4768	**	**	5.13	2.1364	2.8122	**	**
	7	-1.5	1.8816	2.4768	NS	NS	-4.49	2.1364	2.8122	NS	**
	8	-1.66	1.8816	2.4768	NS	NS	10.1	2.1364	2.8122	**	**
	9	-2.26	1.8816	2.4768	NS	*	5.15	2.1364	2.8122	**	**
	10	-4.04	1.8816	2.4768	NS	**	-6.41	2.1364	2.8122	NS	**
	11	-5.46	1.8816	2.4768	NS	**	3.83	2.1364	2.8122	**	**
	12	1.47	1.8816	2.4768	NS	NS	1.43	2.1364	2.8122	NS	NS
	13	-3.68	1.8816	2.4768	NS	**	1.11	2.1364	2.8122	NS	NS
	14	-0.53	1.8816	2.4768	NS	NS	-2.8	2.1364	2.8122	NS	*
	15	4.65	1.8816	2.4768	**	**	6.67	2.1364	2.8122	**	**
	16	3.46	1.8816	2.4768	**	**	-3.93	2.1364	2.8122	NS	**
	17	3.13	1.8816	2.4768	**	**	-2.22	2.1364	2.8122	NS	*
	18	0.56	1.8816	2.4768	NS	NS	-5.33	2.1364	2.8122	NS	**
	19	2.93	1.8816	2.4768	**	**	-7.12	2.1364	2.8122	NS	**
	20	2.02	1.8816	2.4768	*	*	-2.62	2.1364	2.8122	NS	*
	21	0.03	1.8816	2.4768	NS	NS	-1.28	2.1364	2.8122	NS	NS
	22	-4.38	1.8816	2.4768	NS	**	-6.44	2.1364	2.8122	NS	**
	23	-4.72	1.8816	2.4768	NS	**	2.4	2.1364	2.8122	*	*
	24	-1.92	1.8816	2.4768	NS	*	15.89	2.1364	2.8122	**	**
	25	-0.68	1.8816	2.4768	NS	NS	-5.09	2.1364	2.8122	NS	**
	26	5	1.8816	2.4768	**	**	-1.91	2.1364	2.8122	NS	NS
	27	1.68	1.8816	2.4768	NS	NS	-6.73	2.1364	2.8122	NS	**
	28	1.93	1.8816	2.4768	*	*	-1.07	2.1364	2.8122	NS	NS
	29	-2.88	1.8816	2.4768	NS	**	-1.92	2.1364	2.8122	NS	NS
	30	-2.29	1.8816	2.4768	NS	*	2.17	2.1364	2.8122	*	*
	31	-0.98	1.8816	2.4768	NS	NS	-7.25	2.1364	2.8122	NS	**
	32	-3.51	1.8816	2.4768	NS	**	-0.14	2.1364	2.8122	NS	NS
	33	-1.25	1.8816	2.4768	NS	NS	0.69	2.1364	2.8122	NS	NS
	34	2.54	1.8816	2.4768	**	**	2.64	2.1364	2.8122	*	*
	35	0.22	1.8816	2.4768	NS	NS	-4.44	2.1364	2.8122	NS	**
	36	-4.24	1.8816	2.4768	NS	**	5.79	2.1364	2.8122	**	**
	37	-4.46	1.8816	2.4768	NS	**	1.92	2.1364	2.8122	NS	NS
	38	-0.48	1.8816	2.4768	NS	NS	-2.59	2.1364	2.8122	NS	*
	39	-0.08	1.8816	2.4768	NS	NS	-4.04	2.1364	2.8122	NS	**
	40	-0.72	1.8816	2.4768	NS	NS	0.24	2.1364	2.8122	NS	NS
	41	-0.9	1.8816	2.4768	NS	NS	-2.64	2.1364	2.8122	NS	*
	42	-1.18	1.8816	2.4768	NS	NS	-6.52	2.1364	2.8122	NS	**
	43	1	1.8816	2.4768	NS	NS	-2.12	2.1364	2.8122	NS	NS
	44	0.4	1.8816	2.4768	NS	NS	-2.03	2.1364	2.8122	NS	NS
	45	-2.77	1.8816	2.4768	NS	**	0.31	2.1364	2.8122	NS	NS
					SE	0.05			SE	0.2
		protein content
		E1	0.01	0.05	sign	final	E2	0.01	0.05	sign	final
	1	0.29	0.098	0.129	**	**	0.19	0.392	0.516	NS	NS
	2	-0.3	0.098	0.129	NS	**	0.3	0.392	0.516	NS	NS
	3	-0.58	0.098	0.129	NS	**	0.69	0.392	0.516	**	**
	4	-0.1	0.098	0.129	NS	*	0.41	0.392	0.516	*	*
	5	-0.44	0.098	0.129	NS	**	0.8	0.392	0.516	**	**
	6	-0.66	0.098	0.129	NS	**	0.03	0.392	0.516	NS	NS
	7	-0.59	0.098	0.129	NS	**	-0.17	0.392	0.516	NS	NS
	8	-0.28	0.098	0.129	NS	**	0.31	0.392	0.516	NS	NS
	9	-0.26	0.098	0.129	NS	**	-0.44	0.392	0.516	NS	*
	10	-0.5	0.098	0.129	NS	**	-0.15	0.392	0.516	NS	NS
	11	0.21	0.098	0.129	**	**	-0.03	0.392	0.516	NS	NS
	12	-0.37	0.098	0.129	NS	**	0.54	0.392	0.516	**	**
	13	-0.49	0.098	0.129	NS	**	0.19	0.392	0.516	NS	NS
	14	-0.91	0.098	0.129	NS	**	-0.08	0.392	0.516	NS	NS
	15	0.07	0.098	0.129	NS	NS	0.02	0.392	0.516	NS	NS
	16	0.2	0.098	0.129	**	**	0.29	0.392	0.516	NS	NS
	17	0.38	0.098	0.129	**	**	0.33	0.392	0.516	NS	NS
	18	-0.11	0.098	0.129	NS	*	0.11	0.392	0.516	NS	NS
	19	-1.03	0.098	0.129	NS	**	-0.14	0.392	0.516	NS	NS
	20	0.06	0.098	0.129	NS	NS	0.01	0.392	0.516	NS	NS
	21	-0.06	0.098	0.129	NS	NS	-0.24	0.392	0.516	NS	NS
	22	-0.17	0.098	0.129	NS	**	1.02	0.392	0.516	**	**
	23	0.31	0.098	0.129	**	**	0.27	0.392	0.516	NS	NS
	24	0.13	0.098	0.129	**	**	-0.52	0.392	0.516	NS	**
	25	0.35	0.098	0.129	**	**	-0.25	0.392	0.516	NS	NS
	26	0.51	0.098	0.129	**	**	-0.46	0.392	0.516	NS	*
	27	-0.61	0.098	0.129	NS	**	0.08	0.392	0.516	NS	NS
	28	-0.26	0.098	0.129	NS	**	-0.07	0.392	0.516	NS	NS
	29	-0.1	0.098	0.129	NS	*	0.03	0.392	0.516	NS	NS
	30	0.73	0.098	0.129	**	**	0.25	0.392	0.516	NS	NS
	31	0.6	0.098	0.129	**	**	0.2	0.392	0.516	NS	NS
	32	-0.18	0.098	0.129	NS	**	-0.34	0.392	0.516	NS	NS
	33	0.1	0.098	0.129	*	*	-0.2	0.392	0.516	NS	NS
	34	0.13	0.098	0.129	**	**	0.13	0.392	0.516	NS	NS
	35	-0.17	0.098	0.129	NS	**	0.56	0.392	0.516	**	**
	36	-0.25	0.098	0.129	NS	**	0.33	0.392	0.516	NS	NS
	37	-0.92	0.098	0.129	NS	**	-0.56	0.392	0.516	NS	**
	38	-0.57	0.098	0.129	NS	**	-0.1	0.392	0.516	NS	NS
	39	-0.43	0.098	0.129	NS	**	-0.06	0.392	0.516	NS	NS
	40	-0.39	0.098	0.129	NS	**	-0.07	0.392	0.516	NS	NS
	41	-0.61	0.098	0.129	NS	**	-0.41	0.392	0.516	NS	*
	42	-0.26	0.098	0.129	NS	**	-0.08	0.392	0.516	NS	NS
	43	-1.2	0.098	0.129	NS	**	0.02	0.392	0.516	NS	NS
	44	-0.6	0.098	0.129	NS	**	-0.29	0.392	0.516	NS	NS
	45	0	0.098	0.129	NS	NS	-0.28	0.392	0.516	NS	NS
					SE	0.41			SE	0.51
		iron
		E1	0.01	0.05	sign	final	E2	0.01	0.05	sign	final
	1	-0.15	0.8036	1.0578	NS	NS	-2.02	0.9996	1.3158	NS	**
	2	-3.61	0.8036	1.0578	NS	**	0.43	0.9996	1.3158	NS	NS
	3	-0.23	0.8036	1.0578	NS	NS	3.78	0.9996	1.3158	**	**
	4	0.22	0.8036	1.0578	NS	NS	-0.15	0.9996	1.3158	NS	NS
	5	3.67	0.8036	1.0578	**	**	1.13	0.9996	1.3158	*	*
	6	-3.77	0.8036	1.0578	NS	**	-0.04	0.9996	1.3158	NS	NS
	7	1.8	0.8036	1.0578	**	**	0.52	0.9996	1.3158	NS	NS
	8	4.09	0.8036	1.0578	**	**	5.09	0.9996	1.3158	**	**
	9	1.93	0.8036	1.0578	**	**	4.46	0.9996	1.3158	**	**
	10	-3.45	0.8036	1.0578	NS	**	6.56	0.9996	1.3158	**	**
	11	0.74	0.8036	1.0578	NS	NS	-1.44	0.9996	1.3158	NS	**
	12	-2.73	0.8036	1.0578	NS	**	-2.13	0.9996	1.3158	NS	**
	13	-5.42	0.8036	1.0578	NS	**	1.04	0.9996	1.3158	*	*
	14	12.67	0.8036	1.0578	**	**	-2.13	0.9996	1.3158	NS	**
	15	-1.95	0.8036	1.0578	NS	**	-0.32	0.9996	1.3158	NS	NS
	16	-2.81	0.8036	1.0578	NS	**	3.9	0.9996	1.3158	**	**
	17	1.47	0.8036	1.0578	**	**	-1.51	0.9996	1.3158	NS	**
	18	0.51	0.8036	1.0578	NS	NS	-0.59	0.9996	1.3158	NS	NS
	19	2.08	0.8036	1.0578	**	**	-2.04	0.9996	1.3158	NS	**
	20	3.97	0.8036	1.0578	**	**	-1.6	0.9996	1.3158	NS	**
	21	0.65	0.8036	1.0578	NS	NS	-1.3	0.9996	1.3158	NS	*
	22	-1.17	0.8036	1.0578	NS	**	-0.4	0.9996	1.3158	NS	NS
	23	-1.35	0.8036	1.0578	NS	**	-2.1	0.9996	1.3158	NS	**
	24	-0.42	0.8036	1.0578	NS	NS	-1.49	0.9996	1.3158	NS	**
	25	1.82	0.8036	1.0578	**	**	-2.27	0.9996	1.3158	NS	**
	26	-1.36	0.8036	1.0578	NS	**	3.11	0.9996	1.3158	**	**
	27	-2.21	0.8036	1.0578	NS	**	0.14	0.9996	1.3158	NS	NS
	28	2.35	0.8036	1.0578	**	**	2.1	0.9996	1.3158	**	**
	29	-1.76	0.8036	1.0578	NS	**	2.75	0.9996	1.3158	**	**
	30	3	0.8036	1.0578	**	**	0.27	0.9996	1.3158	NS	NS
	31	-0.27	0.8036	1.0578	NS	NS	2.41	0.9996	1.3158	**	**
	32	4.95	0.8036	1.0578	**	**	1.9	0.9996	1.3158	**	**
	33	-2.09	0.8036	1.0578	NS	**	-3.21	0.9996	1.3158	NS	**
	34	-2.96	0.8036	1.0578	NS	**	-7	0.9996	1.3158	NS	**
	35	0.89	0.8036	1.0578	*	*	4.06	0.9996	1.3158	**	**
	36	2.58	0.8036	1.0578	**	**	4.33	0.9996	1.3158	**	**
	37	-1.57	0.8036	1.0578	NS	**	5.7	0.9996	1.3158	**	**
	38	0.96	0.8036	1.0578	*	*	-7.08	0.9996	1.3158	NS	**
	39	0	0.8036	1.0578	NS	NS	-2.11	0.9996	1.3158	NS	**
	40	-4.85	0.8036	1.0578	NS	**	-1.63	0.9996	1.3158	NS	**
	41	-6.3	0.8036	1.0578	NS	**	-1.69	0.9996	1.3158	NS	**
	42	-1.46	0.8036	1.0578	NS	**	-0.72	0.9996	1.3158	NS	NS
	43	1.75	0.8036	1.0578	**	**	2.36	0.9996	1.3158	**	**
	44	-0.62	0.8036	1.0578	NS	NS	-2.81	0.9996	1.3158	NS	**
	45	-1.77	0.8036	1.0578	NS	**	-3.6	0.9996	1.3158	NS	**
					SE	0.2			SE	0.22
		zinc
		E1	0.01	0.05	sign	final	E2	0.01	0.05	sign	final
	1	1.18	0.392	0.516	**	**	-0.96	0.4312	0.5676	NS	**
	2	-0.11	0.392	0.516	NS	NS	-0.73	0.4312	0.5676	NS	**
	3	-0.69	0.392	0.516	NS	**	-0.55	0.4312	0.5676	NS	*
	4	-1.05	0.392	0.516	NS	**	-1	0.4312	0.5676	NS	**
	5	-1.38	0.392	0.516	NS	**	-0.23	0.4312	0.5676	NS
	6	-1.61	0.392	0.516	NS	**	-0.9	0.4312	0.5676	NS	NS
	7	-1.03	0.392	0.516	NS	**	-0.77	0.4312	0.5676	NS	**
	8	0.24	0.392	0.516	NS	NS	-0.97	0.4312	0.5676	NS	**
	9	0.63	0.392	0.516	**	**	-0.39	0.4312	0.5676	NS	NS
	10	-0.47	0.392	0.516	NS	*	0.87	0.4312	0.5676	**	**
	11	-0.26	0.392	0.516	NS	NS	0.64	0.4312	0.5676	**	**
	12	-0.58	0.392	0.516	NS	**	0.22	0.4312	0.5676	NS	NS
	13	-1.28	0.392	0.516	NS	**	-0.49	0.4312	0.5676	NS	*
	14	2.26	0.392	0.516	**	**	-1.37	0.4312	0.5676	NS	**
	15	-1.19	0.392	0.516	NS	**	-1.68	0.4312	0.5676	NS	**
	16	-1.3	0.392	0.516	NS	**	-1.62	0.4312	0.5676	NS	**
	17	0.26	0.392	0.516	NS	NS	-1.31	0.4312	0.5676	NS	**
	18	-0.17	0.392	0.516	NS	NS	-1.78	0.4312	0.5676	NS	**
	19	0.11	0.392	0.516	NS	NS	-1.52	0.4312	0.5676	NS	**
	20	-0.53	0.392	0.516	NS	**	-1.28	0.4312	0.5676	NS	**
	21	-1.3	0.392	0.516	NS	**	0.35	0.4312	0.5676	NS	NS
	22	-0.1	0.392	0.516	NS	NS	0.51	0.4312	0.5676	*	*
	23	0.37	0.392	0.516	NS	NS	-0.63	0.4312	0.5676	NS	**
	24	-0.33	0.392	0.516	NS	NS	0.38	0.4312	0.5676	NS	NS
	25	-0.02	0.392	0.516	NS	NS	-0.42	0.4312	0.5676	NS	NS
	26	0.96	0.392	0.516	**	**	1.19	0.4312	0.5676	**	**
	27	-1.62	0.392	0.516	NS	**	1.17	0.4312	0.5676	**	**
	28	-0.46	0.392	0.516	NS	*	-1.29	0.4312	0.5676	NS	**
	29	-0.15	0.392	0.516	NS	NS	-0.33	0.4312	0.5676	NS	NS
	30	0.17	0.392	0.516	NS	NS	-0.9	0.4312	0.5676	NS	**
	31	-0.67	0.392	0.516	NS	**	1.54	0.4312	0.5676	**	**
	32	-0.42	0.392	0.516	NS	*	0.13	0.4312	0.5676	NS	NS
	33	1.81	0.392	0.516	**	**	-0.47	0.4312	0.5676	NS	*
	34	-0.36	0.392	0.516	NS	NS	0.03	0.4312	0.5676	NS	NS
	35	-0.37	0.392	0.516	NS	NS	-0.66	0.4312	0.5676	NS	**
	36	2.66	0.392	0.516	**	**	-1.04	0.4312	0.5676	NS	**
	37	-2.59	0.392	0.516	NS	**	-1.3	0.4312	0.5676	NS	**
	38	-0.39	0.392	0.516	NS	*	-0.98	0.4312	0.5676	NS	**
	39	-0.15	0.392	0.516	NS	NS	-1.03	0.4312	0.5676	NS	**
	40	-0.11	0.392	0.516	NS	NS	-0.18	0.4312	0.5676	NS	NS
	41	0.07	0.392	0.516	NS	NS	0.51	0.4312	0.5676	*	*
	42	0.59	0.392	0.516	**	**	1.09	0.4312	0.5676	**	**
	43	0.97	0.392	0.516	**	**	0.43	0.4312	0.5676	NS	NS
	44	0.12	0.392	0.516	NS	NS	0.03	0.4312	0.5676	NS	NS
	45	1.12	0.392	0.516	**	**	1.71	0.4312	0.5676	**	**
