# Supplementary material for: Combining ability, heterosis and performance of grain yield and content of Fe, Zn and protein in bread wheat under normal and late sowing conditions
Source: PeerJ. 2023 Mar 9;11:e14971. doi: 10.7717/peerj.14971 (PMC10008312; doi:10.7717/peerj.14971)
Supplement: Supplemental Information 3 [file peerj-11-14971-s003.xlsx]

## Sheet: Mean square Annova 
	Source of variation	D. F.	Mean sum of square
			Grain yield per plant			Protein content
			E1	E2		E1	E2
	Replications	2	2.38	9.48		0.01	0.25
	Genotypes	56	57.87	89.86		1.67	0.56
	Parents	9	26.56	71.7		2.33	0.58
	Hybrids	44	67.93	82.67		0.78	0.51
	Parents v/s Hybrids	1	7.35	485.7		31.9	1.73
	Check v/s Hybrids	1	2.14	262.76		0.005	1.42
	Bet. Checks	1	3.68	58.28		5.73	0.68
	Error	112	3.35	4.19		0.01	0.13
	Genetic components
							Grain yield per plant
	Repli.	CAL F repl	Tab F 5%	Tab F 1%	test	GCA	SCA	Error	σ2 gca	σ2 sca	σ2 gca/σ2 sca	s2A	s2D	CAL F GCA				CAL F SCA				CAL Fσ2 gca				CAL F σ2 sca
E1	3	0.9	3.08039	4.80724	NS	48.88	14.19	1.1	2.89083	13.09	0.220843	5.78167	13.09	44.26	1.96768	2.5759	**	12.85	1.48537	1.74777	**	2.62803	1.96768	2.5759	**	11.9	1.48537	1.74777	**
E2	7.64	1.81	3.08039	4.80724	NS	25.58	30.2	1.4	-0.385	28.8	-0.0133681	-0.77	28.8	18.2	1.96768	2.5759	**	21.49	1.48537	1.74777	**	-0.275	1.96768	2.5759	NS	20.5714	1.48537	1.74777	**
							Protein content
						GCA	SCA	Error	σ2 gca	σ2 sca	σ2 gca/σ2 sca	s2A	s2D	CAL F GCA				CAL F SCA				CAL Fσ2 gca				CAL F σ2 sca
E1	0.011	0.88	3.08039	4.80724	NS	6.56	0.51	0.004	0.504167	0.506	0.996377	1.00833	0.506	150.98	1.96768	2.5759	**	119.2	1.48537	1.74777	**	126.042	1.96768	2.5759	**	126.5	1.48537	1.74777	**
E2	0.23	1.73	3.08039	4.80724	NS	0.25	0.16	0.04	0.0075	0.12	0.0625	0.015	0.12	5.52	1.96768	2.5759	**	3.66	1.48537	1.74777	**	0.1875	1.96768	2.5759	NS	3	1.48537	1.74777	**
	Source of variation	D. F.	Mean sum of square
			Iron			Zinc
			E1	E2		E1	E2
	Replications	2	0.65	0.1		0.05	0.16
	Genotypes	56	37.51	31.36		4.88	5.92
	Parents	9	49.72	32.59		4.51	1.46
	Hybrids	44	33.27	32.36		4.86	4.38
	Parents v/s Hybrids	1	11.77	7.99		18.63	93.52
	Check v/s Hybrids	1	91.09	33.14		0.07	40.63
	Bet. Checks	1	79.62	0.54		0.03	1.48
	Error	112	0.65	0.89		0.14	0.21
	Genetic components
							Iron
						GCA	SCA	Error	σ2 gca	σ2 sca	σ2 gca/σ2 sca	s2A	s2D	CAL F GCA				CAL F SCA				CAL Fσ2 gca				CAL F σ2 sca
E1	0.88	1.43	3.08039	4.80724	NS	10.55	12.13	0.2	-0.131667	11.93	-0.0110366	-0.263333	11.93	51.05	1.96768	2.5759	**	58.73	1.48537	1.74777	**	-0.658333	1.96768	2.5759	NS	59.65	1.48537	1.74777	**
E2	0.05	0.05	3.08039	4.80724	NS	6.71	11.43	0.3	-0.393333	11.13	-0.0353399	-0.786667	11.13	21.84	1.96768	2.5759	**	37.17	1.48537	1.74777	**	-1.31111	1.96768	2.5759	NS	37.1	1.48537	1.74777	**
							Zinc
						GCA	SCA	Error	σ2 gca	σ2 sca	σ2 gca/σ2 sca	s2A	s2D	CAL F GCA	1.96768	2.5759	**	CAL F SCA				CAL Fσ2 gca				CAL F σ2 sca
E1	0.05	0.34	3.08039	4.80724	NS	3.51	1.32	0.04	0.1825	1.28	0.142578	0.365	1.28	71.95	1.96768	2.5759	**	27.09	1.48537	1.74777	**	4.5625	1.96768	2.5759	**	32	1.48537	1.74777	**
E2	0.3	1.52	3.08039	4.80724	NS	2.59	1.7	0.06	0.0741667	1.64	0.0452236	0.148333	1.64	39.08	1.96768	2.5759	**	25.58	1.48537	1.74777	**	1.23611	1.96768	2.5759	NS	27.3333	1.48537	1.74777	**

## Sheet: Significantly calculation
sourec of variation	df	SS	MS	Cal F	Tab F 5%	Tab F 1%	test	S.Em.	CD
Replications	2	7.5	3.75	2.77778	3.07731	4.79982	NS
Genotypes	56	3661.28	65.38	48.4296	1.44658	1.68456	**
Parents	9	479.61	53.29	39.4741	1.96449	2.5697	**
Hybrids	44	2976.16	67.64	50.1037	1.48521	1.74717	**
Parents v/s Hybrids	1	81.83	81.83	60.6148	3.92583	6.86671	**
Check v/s Hybrids	1	36.65	36.65	27.1481	3.92583	6.86671	**
Bet. Checks	1	96	96	71.1111	3.92583	6.86671	**
Error	112	151.2	1.35
