# Supplementary material for: Combining ability, heterosis and performance of grain yield and content of Fe, Zn and protein in bread wheat under normal and late sowing conditions
Source: PeerJ. 2023 Mar 9;11:e14971. doi: 10.7717/peerj.14971 (PMC10008312; doi:10.7717/peerj.14971)
Supplement: Supplemental Information 4 — Protein content. [file peerj-11-14971-s004.xlsx]

## Sheet: E1 
			HETEROBELTIOSIS															STANDARD HETEROSIS									SH1					SH2
	F 1		BP1	BP2		BP1 d	BP2 d	Final		BP1 %	BP2 %	Final	0.01	0.05	sign	final		CH1	CH2		SH1d	SH2 d		SH 1 %	SH 2 %		0.01	0.05	sign	final		0.01	0.05	sign	final
GW 451 x GW-496	10.6527		11.4967	11.242		-0.844	-0.589333	-0.844		-7.34126	-5.24225	-7.34126	0.15	0.2	NS	NS		11.7	9.7		-1.04733	0.952667		-8.95157	9.82131		0.15	0.2	NS	**		0.15	0.2	**	**
GW 451 x LOK-1	10.3627		11.4967	12.1247		-1.134	-1.762	-1.762		-9.86373	-14.5324	-14.5324	0.15	0.2	NS	NS		11.7	9.7		-1.33733	0.662667		-11.4302	6.83162		0.15	0.2	NS	*		0.15	0.2	**	**
GW 451 x GW-322	10.1507		11.4967	11.3507		-1.346	-1.2	-1.346		-11.7077	-10.5721	-11.7077	0.15	0.2	NS	NS		11.7	9.7		-1.54933	0.450667		-13.2422	4.64605		0.15	0.2	NS	*		0.15	0.2	**	**
GW 451 x GW-366	10.1973		11.4967	10.8913		-1.29933	-0.694	-1.29933		-11.3018	-6.37204	-11.3018	0.15	0.2	NS	NS		11.7	9.7		-1.50267	0.497333		-12.8433	5.12715		0.15	0.2	NS	**		0.15	0.2	**	*
GW 451 x HI-1544	10.018		11.4967	11.8507		-1.47867	-1.83267	-1.83267		-12.8617	-15.4647	-15.4647	0.15	0.2	NS	NS		11.7	9.7		-1.682	0.318		-14.3761	3.27835		0.15	0.2	NS	**		0.15	0.2	**	NS
GW 451 x GW-173	10.0873		11.4967	13.416		-1.40933	-3.32867	-3.32867		-12.2586	-24.8112	-24.8112	0.15	0.2	NS	NS		11.7	9.7		-1.61267	0.387333		-13.7835	3.99313		0.15	0.2	NS			0.15	0.2	**	NS
GW 451 x GW-11	9.90333		11.4967	12.936		-1.59333	-3.03267	-3.03267		-13.8591	-23.4436	-23.4436	0.15	0.2	NS	NS		11.7	9.7		-1.79667	0.203333		-15.3561	2.09622		0.15	0.2	NS	*8		0.15	0.2	**	**
GW 451 x HD-2864	10.326		11.4967	12.2313		-1.17067	-1.90533	-1.90533		-10.1827	-15.5775	-15.5775	0.15	0.2	NS	NS		11.7	9.7		-1.374	0.626		-11.7436	6.45361		0.15	0.2	NS	*		0.15	0.2	**	NS
GW 451 x USA-385	9.952		11.4967	10.6267		-1.54467	-0.674667	-1.54467		-13.4358	-6.34881	-13.4358	0.15	0.2	NS	NS		11.7	9.7		-1.748	0.252		-14.9402	2.59794		0.15	0.2	NS	NS		0.15	0.2	**	NS
GW-496 x LOK-1	10.4827		11.242	12.1247		-0.759333	-1.642	-1.642		-6.75443	-13.5426	-13.5426	0.15	0.2	NS	NS		11.7	9.7		-1.21733	0.782667		-10.4046	8.06873		0.15	0.2	NS	*		0.15	0.2	**	NS
GW-496 x GW-322	11.2613		11.242	11.3507		0.0193333	-0.0893333	-0.0893333		0.171974	-0.787032	-0.787032	0.15	0.2	NS	1		11.7	9.7		-0.438667	1.56133		-3.74929	16.0962		0.15	0.2	NS	*		0.15	0.2	**	NS
GW-496 x GW-366	10.2527		11.242	10.8913		-0.989333	-0.638667	-0.989333		-8.80033	-5.86399	-8.80033	0.15	0.2	NS	NS		11.7	9.7		-1.44733	0.552667		-12.3704	5.69759		0.15	0.2	NS	**		0.15	0.2	**	**
GW-496 x HI-1544	10.2953		11.242	11.8507		-0.946667	-1.55533	-1.55533		-8.4208	-13.1244	-13.1244	0.15	0.2	NS	NS		11.7	9.7		-1.40467	0.595333		-12.0057	6.13746		0.15	0.2	NS	NS		0.15	0.2	**	NS
GW-496 x GW-173	10.162		11.242	13.416		-1.08	-3.254	-3.254		-9.60683	-24.2546	-24.2546	0.15	0.2	NS	NS		11.7	9.7		-1.538	0.462		-13.1453	4.76289		0.15	0.2	NS	**		0.15	0.2	**	**
GW-496 x GW-11	10.8887		11.242	12.936		-0.353333	-2.04733	-2.04733		-3.14298	-15.8266	-15.8266	0.15	0.2	NS	NS		11.7	9.7		-0.811333	1.18867		-6.93447	12.2543		0.15	0.2	NS	NS		0.15	0.2	**	NS
GW-496 x HD-2864	11.1293		11.242	12.2313		-0.112667	-1.102	-1.102		-1.00219	-9.00965	-9.00965	0.15	0.2	NS	NS		11.7	9.7		-0.570667	1.42933		-4.87749	14.7354		0.15	0.2	NS	NS		0.15	0.2	**	NS
GW-496 x USA-385	10.9147		11.242	10.6267		-0.327333	0.288	-0.327333		-2.9117	2.71016	-2.9117	0.15	0.2	NS	NS		11.7	9.7		-0.785333	1.21467		-6.71225	12.5223		0.15	0.2	NS	**		0.15	0.2	**	**
LOK-1 x GW-322	11.242		12.1247	11.3507		-0.882667	-0.108667	-0.882667		-7.27993	-0.957359	-7.27993	0.15	0.2	NS	NS		11.7	9.7		-0.458	1.542		-3.91453	15.8969		0.15	0.2	NS	*		0.15	0.2	**	NS
LOK-1 x GW-366	9.88867		12.1247	10.8913		-2.236	-1.00267	-2.236		-18.4417	-9.2061	-18.4417	0.15	0.2	NS	NS		11.7	9.7		-1.81133	0.188667		-15.4815	1.94502		0.15	0.2	NS	NS		0.15	0.2	*	NS
LOK-1 x HI-1544	11.138		12.1247	11.8507		-0.986667	-0.712667	-0.986667		-8.13768	-6.01373	-8.13768	0.15	0.2	NS	NS		11.7	9.7		-0.562	1.438		-4.80342	14.8247		0.15	0.2	NS	NS		0.15	0.2	**	**
LOK-1 x GW-173	11.3113		12.1247	13.416		-0.813333	-2.10467	-2.10467		-6.70809	-15.6877	-15.6877	0.15	0.2	NS	NS		11.7	9.7		-0.388667	1.61133		-3.32194	16.6117		0.15	0.2	NS	NS		0.15	0.2	**	NS
LOK-1 x GW-11	10.9493		12.1247	12.936		-1.17533	-1.98667	-1.98667		-9.69374	-15.3577	-15.3577	0.15	0.2	NS	NS		11.7	9.7		-0.750667	1.24933		-6.41595	12.8797		0.15	0.2	NS	NS		0.15	0.2	**	**
LOK-1 x HD-2864	11.536		12.1247	12.2313		-0.588667	-0.695333	-0.695333		-4.85512	-5.68485	-5.68485	0.15	0.2	NS	NS		11.7	9.7		-0.164	1.836		-1.40171	18.9278		0.15	0.2	NS	NS		0.15	0.2	**	NS
LOK-1 x USA-385	10.964		12.1247	10.6267		-1.16067	0.337333	-1.16067		-9.57277	3.1744	-9.57277	0.15	0.2	NS	NS		11.7	9.7		-0.736	1.264		-6.2906	13.0309		0.15	0.2	NS	NS		0.15	0.2	**	**
GW-322 x GW-366	11.338		11.3507	10.8913		-0.0126667	0.446667	-0.0126667		-0.111594	4.10112	-0.111594	0.15	0.2	NS	1		11.7	9.7		-0.362	1.638		-3.09402	16.8866		0.15	0.2	NS	NS		0.15	0.2	**	NS
GW-322 x HI-1544	11.6547		11.3507	11.8507		0.304	-0.196	-0.196		2.67826	-1.65392	-1.65392	0.15	0.2	NS	NS		11.7	9.7		-0.0453333	1.95467		-0.387464	20.1512		0.15	0.2	NS	NS		0.15	0.2	**	NS
GW-322 x GW-173	10.828		11.3507	13.416		-0.522667	-2.588	-2.588		-4.60472	-19.2904	-19.2904	0.15	0.2	NS	NS		11.7	9.7		-0.872	1.128		-7.45299	11.6289		0.15	0.2	NS	NS		0.15	0.2	**	NS
GW-322 x GW-11	10.9253		11.3507	12.936		-0.425333	-2.01067	-2.01067		-3.74721	-15.5432	-15.5432	0.15	0.2	NS	NS		11.7	9.7		-0.774667	1.22533		-6.62108	12.6323		0.15	0.2	NS	NS		0.15	0.2	**	*
GW-322 x HD-2864	11.192		11.3507	12.2313		-0.158667	-1.03933	-1.03933		-1.39786	-8.4973	-8.4973	0.15	0.2	NS	NS		11.7	9.7		-0.508	1.492		-4.34188	15.3814		0.15	0.2	NS	NS		0.15	0.2	**	NS
GW-322 x USA-385	11.6347		11.3507	10.6267		0.284	1.008	0.284		2.50206	9.48557	2.50206	0.15	0.2	**	**		11.7	9.7		-0.0653333	1.93467		-0.558405	19.945		0.15	0.2	NS	NS		0.15	0.2	**	NS
GW-366 x HI-1544	11.3213		10.8913	11.8507		0.43	-0.529333	-0.529333		3.94809	-4.4667	-4.4667	0.15	0.2	NS	NS		11.7	9.7		-0.378667	1.62133		-3.23647	16.7148		0.15	0.2	NS	NS		0.15	0.2	**	NS
GW-366 x GW-173	10.8227		10.8913	13.416		-0.0686667	-2.59333	-2.59333		-0.630471	-19.3302	-19.3302	0.15	0.2	NS	NS		11.7	9.7		-0.877333	1.12267		-7.49858	11.5739		0.15	0.2	NS	NS		0.15	0.2	**	NS
GW-366 x GW-11	10.8573		10.8913	12.936		-0.034	-2.07867	-2.07867		-0.312175	-16.0689	-16.0689	0.15	0.2	NS	NS		11.7	9.7		-0.842667	1.15733		-7.20228	11.9313		0.15	0.2	NS	**		0.15	0.2	**	**
GW-366 x HD-2864	10.998		10.8913	12.2313		0.106667	-1.23333	-1.23333		0.979372	-10.0834	-10.0834	0.15	0.2	NS	NS		11.7	9.7		-0.702	1.298		-6	13.3814		0.15	0.2	NS	NS		0.15	0.2	**	NS
GW-366 x USA-385	10.306		10.8913	10.6267		-0.585333	-0.320667	-0.585333		-5.3743	-3.01757	-5.3743	0.15	0.2	NS	NS		11.7	9.7		-1.394	0.606		-11.9145	6.24742		0.15	0.2	NS	NS		0.15	0.2	**	NS
HI-1544 x GW-173	10.924		11.8507	13.416		-0.926667	-2.492	-2.492		-7.81953	-18.5748	-18.5748	0.15	0.2	NS	NS		11.7	9.7		-0.776	1.224		-6.63248	12.6186		0.15	0.2	NS	**		0.15	0.2	**	**
HI-1544 x GW-11	10.004		11.8507	12.936		-1.84667	-2.932	-2.932		-15.5828	-22.6654	-22.6654	0.15	0.2	NS	NS		11.7	9.7		-1.696	0.304		-14.4957	3.13402		0.15	0.2	NS	NS		0.15	0.2	**	**
HI-1544 x HD-2864	10.454		11.8507	12.2313		-1.39667	-1.77733	-1.77733		-11.7856	-14.531	-14.531	0.15	0.2	NS	NS		11.7	9.7		-1.246	0.754		-10.6496	7.7732		0.15	0.2	NS	NS		0.15	0.2	**	NS
HI-1544 x USA-385	10.21		11.8507	10.6267		-1.64067	-0.416667	-1.64067		-13.8445	-3.92095	-13.8445	0.15	0.2	NS	NS		11.7	9.7		-1.49	0.51		-12.735	5.25773		0.15	0.2	NS	*		0.15	0.2	**	**
GW-173 x GW-11	10.8187		13.416	12.936		-2.59733	-2.11733	-2.59733		-19.36	-16.3678	-19.36	0.15	0.2	NS	NS		11.7	9.7		-0.881333	1.11867		-7.53276	11.5326		0.15	0.2	NS	NS		0.15	0.2	**	NS
GW-173 x HD-2864	10.7027		13.416	12.2313		-2.71333	-1.52867	-2.71333		-20.2246	-12.498	-20.2246	0.15	0.2	NS	NS		11.7	9.7		-0.997333	1.00267		-8.52422	10.3368		0.15	0.2	NS	NS		0.15	0.2	**	NS
GW-173 x USA-385	10.6627		13.416	10.6267		-2.75333	0.036	-2.75333		-20.5228	0.33877	-20.5228	0.15	0.2	NS	NS		11.7	9.7		-1.03733	0.962667		-8.8661	9.9244		0.15	0.2	NS	NS		0.15	0.2	**	NS
GW-11 x HD-2864	9.862		12.936	12.2313		-3.074	-2.36933	-3.074		-23.7631	-19.371	-23.7631	0.15	0.2	NS	NS		11.7	9.7		-1.838	0.162		-15.7094	1.6701		0.15	0.2	NS	NS		0.15	0.2	*	*
GW-11 x USA-385	10.0607		12.936	10.6267		-2.87533	-0.566	-2.87533		-22.2274	-5.32622	-22.2274	0.15	0.2	NS	NS		11.7	9.7		-1.63933	0.360667		-14.0114	3.71821		0.15	0.2	NS	NS		0.15	0.2	**	*
HD-2864 x USA-385	10.7847		12.2313	10.6267		-1.44667	0.158	-1.44667		-11.8275	1.48683	-11.8275	0.15	0.2	NS	NS		11.7	9.7		-0.915333	1.08467		-7.82336	11.1821		0.15	0.2	NS	*		0.15	0.2	**	NS
											max	2.50206											max	-0.387464	20.1512
											min	-24.8112											min	-15.7094	1.6701
GW - 451 (P1)	11.4967
GW - 496 (P2)	11.242
LOK-1 (P3)	12.1247
GW-322 (P4)	11.3507
GW-366 (P5)	10.8913
HI-1544 (P6)	11.8507
GW-173 (P7)	13.416
GW-11 (P8)	12.936
HD-2864 (P9)	12.2313
USA-385 (P10)	10.6267

## Sheet: E2
			HETEROBELTIOSIS															STANDARD HETEROSIS									SH1					SH2
	F 1		BP1	BP2		BP1 d	BP2 d	Final		BP1 %	BP2 %	Final	0.01	0.05	sign	final		CH1	CH2		SH1d	SH2 d		SH 1 %	SH 2 %		0.01	0.05	sign	final		0.01	0.05	sign	final
GW 451 x GW-496	11.4987		10.4427	10.4713		1.056	1.02733	1.02733		10.1124	9.81091	9.81091	0.58	0.77	**	**		11.1	10.4		0.398667	1.09867		3.59159	10.5641		0.58	0.77	NS	NS		0.58	0.77	**	NS
GW 451 x LOK-1	11.8507		10.4427	11.2593		1.408	0.591333	0.591333		13.4831	5.25194	5.25194	0.58	0.77	*	*		11.1	10.4		0.750667	1.45067		6.76276	13.9487		0.58	0.77	*	*		0.58	0.77	**	*
GW 451 x GW-322	11.916		10.4427	10.7833		1.47333	1.13267	1.13267		14.1088	10.5039	10.5039	0.58	0.77	**	**		11.1	10.4		0.816	1.516		7.35135	14.5769		0.58	0.77	**	**		0.58	0.77	**	*
GW 451 x GW-366	11.6487		10.4427	10.5167		1.206	1.132	1.132		11.5488	10.7639	10.7639	0.58	0.77	**	**		11.1	10.4		0.548667	1.24867		4.94294	12.0064		0.58	0.77	NS	NS		0.58	0.77	**	NS
GW 451 x HI-1544	12.2767		10.4427	11.2647		1.834	1.012	1.012		17.5626	8.98384	8.98384	0.58	0.77	**	**		11.1	10.4		1.17667	1.87667		10.6006	18.0449		0.58	0.77	**	**		0.58	0.77	**	*
GW 451 x GW-173	11.4833		10.4427	11.794		1.04067	-0.310667	-0.310667		9.96553	-2.63411	-2.63411	0.58	0.77	NS	NS		11.1	10.4		0.383333	1.08333		3.45345	10.4167		0.58	0.77	NS	NS		0.58	0.77	**	NS
GW 451 x GW-11	11.1753		10.4427	11.3473		0.732667	-0.172	-0.172		7.01609	-1.51577	-1.51577	0.58	0.77	NS	NS		11.1	10.4		0.0753333	0.775333		0.678679	7.45513		0.58	0.77	NS	NS		0.58	0.77	**	NS
GW 451 x HD-2864	11.5867		10.4427	10.92		1.144	0.666667	0.666667		10.9551	6.10501	6.10501	0.58	0.77	*	*		11.1	10.4		0.486667	1.18667		4.38438	11.4103		0.58	0.77	NS	NS		0.58	0.77	**	**
GW 451 x USA-385	10.6473		10.4427	10.9433		0.204667	-0.296	-0.296		1.95991	-2.70484	-2.70484	0.58	0.77	NS	NS		11.1	10.4		-0.452667	0.247333		-4.07808	2.37821		0.58	0.77	NS	NS		0.58	0.77	NS	**
GW-496 x LOK-1	11.2053		10.4713	11.2593		0.734	-0.054	-0.054		7.00961	-0.479602	-0.479602	0.58	0.77	NS	NS		11.1	10.4		0.105333	0.805333		0.948949	7.74359		0.58	0.77	NS	NS		0.58	0.77	**	NS
GW-496 x GW-322	11		10.4713	10.7833		0.528667	0.216667	0.216667		5.0487	2.00927	2.00927	0.58	0.77	NS	NS		11.1	10.4		-0.1	0.6		-0.900901	5.76923		0.58	0.77	NS	NS		0.58	0.77	*	*
GW-496 x GW-366	11.5867		10.4713	10.5167		1.11533	1.07	1.07		10.6513	10.1743	10.1743	0.58	0.77	**	**		11.1	10.4		0.486667	1.18667		4.38438	11.4103		0.58	0.77	NS	NS		0.58	0.77	**	*
GW-496 x HI-1544	11.4693		10.4713	11.2647		0.998	0.204667	0.204667		9.53078	1.81689	1.81689	0.58	0.77	NS	NS		11.1	10.4		0.369333	1.06933		3.32733	10.2821		0.58	0.77	NS	NS		0.58	0.77	**	NS
GW-496 x GW-173	11.18		10.4713	11.794		0.708667	-0.614	-0.614		6.76768	-5.20604	-5.20604	0.58	0.77	NS	*		11.1	10.4		0.08	0.78		0.720721	7.5		0.58	0.77	NS	NS		0.58	0.77	**	NS
GW-496 x GW-11	11.176		10.4713	11.3473		0.704667	-0.171333	-0.171333		6.72948	-1.5099	-1.5099	0.58	0.77	NS	NS		11.1	10.4		0.076	0.776		0.684685	7.46154		0.58	0.77	NS	NS		0.58	0.77	**	**
GW-496 x HD-2864	11.3813		10.4713	10.92		0.91	0.461333	0.461333		8.69039	4.22466	4.22466	0.58	0.77	NS	NS		11.1	10.4		0.281333	0.981333		2.53453	9.4359		0.58	0.77	NS	NS		0.58	0.77	**	*
GW-496 x USA-385	11.2347		10.4713	10.9433		0.763333	0.291333	0.291333		7.28974	2.6622	2.6622	0.58	0.77	NS	NS		11.1	10.4		0.134667	0.834667		1.21321	8.02564		0.58	0.77	NS	NS		0.58	0.77	**	**
LOK-1 x GW-322	11.3807		11.2593	10.7833		0.121333	0.597333	0.121333		1.07762	5.53941	1.07762	0.58	0.77	NS	NS		11.1	10.4		0.280667	0.980667		2.52853	9.42949		0.58	0.77	NS	NS		0.58	0.77	**	NS
LOK-1 x GW-366	11.1467		11.2593	10.5167		-0.112667	0.63	-0.112667		-1.00065	5.99049	-1.00065	0.58	0.77	NS	NS		11.1	10.4		0.0466667	0.746667		0.42042	7.17949		0.58	0.77	NS	NS		0.58	0.77	*	NS
LOK-1 x HI-1544	11.5293		11.2593	11.2647		0.27	0.264667	0.264667		2.39801	2.34953	2.34953	0.58	0.77	NS	NS		11.1	10.4		0.429333	1.12933		3.86787	10.859		0.58	0.77	NS	NS		0.58	0.77	**	NS
LOK-1 x GW-173	11.2633		11.2593	11.794		0.004	-0.530667	-0.530667		0.0355261	-4.49946	-4.49946	0.58	0.77	NS	NS		11.1	10.4		0.163333	0.863333		1.47147	8.30128		0.58	0.77	NS	NS		0.58	0.77	**	NS
LOK-1 x GW-11	12.4127		11.2593	11.3473		1.15333	1.06533	1.06533		10.2434	9.3884	9.3884	0.58	0.77	**	**		11.1	10.4		1.31267	2.01267		11.8258	19.3526		0.58	0.77	**	**		0.58	0.77	**	NS
LOK-1 x HD-2864	11.5867		11.2593	10.92		0.327333	0.666667	0.327333		2.90722	6.10501	2.90722	0.58	0.77	NS	NS		11.1	10.4		0.486667	1.18667		4.38438	11.4103		0.58	0.77	NS	NS		0.58	0.77	**	**
LOK-1 x USA-385	10.6187		11.2593	10.9433		-0.640667	-0.324667	-0.640667		-5.69009	-2.9668	-5.69009	0.58	0.77	NS	*		11.1	10.4		-0.481333	0.218667		-4.33634	2.10256		0.58	0.77	NS	NS		0.58	0.77	NS	**
GW-322 x GW-366	10.7067		10.7833	10.5167		-0.0766667	0.19	-0.0766667		-0.710974	1.80666	-0.710974	0.58	0.77	NS	NS		11.1	10.4		-0.393333	0.306667		-3.54354	2.94872		0.58	0.77	NS	NS		0.58	0.77	NS	NS
GW-322 x HI-1544	10.736		10.7833	11.2647		-0.0473333	-0.528667	-0.528667		-0.438949	-4.69314	-4.69314	0.58	0.77	NS	NS		11.1	10.4		-0.364	0.336		-3.27928	3.23077		0.58	0.77	NS	NS		0.58	0.77	NS	*
GW-322 x GW-173	11.258		10.7833	11.794		0.474667	-0.536	-0.536		4.40185	-4.54468	-4.54468	0.58	0.77	NS	NS		11.1	10.4		0.158	0.858		1.42342	8.25		0.58	0.77	NS	NS		0.58	0.77	**	*
GW-322 x GW-11	11		10.7833	11.3473		0.216667	-0.347333	-0.347333		2.00927	-3.06092	-3.06092	0.58	0.77	NS	NS		11.1	10.4		-0.1	0.6		-0.900901	5.76923		0.58	0.77	NS	NS		0.58	0.77	*	**
GW-322 x HD-2864	11.0293		10.7833	10.92		0.246	0.109333	0.109333		2.2813	1.00122	1.00122	0.58	0.77	NS	NS		11.1	10.4		-0.0706667	0.629333		-0.636637	6.05128		0.58	0.77	NS	NS		0.58	0.77	*	*
GW-322 x USA-385	11.0587		10.7833	10.9433		0.275333	0.115333	0.115333		2.55332	1.05391	1.05391	0.58	0.77	NS	NS		11.1	10.4		-0.0413333	0.658667		-0.372372	6.33333		0.58	0.77	NS	NS		0.58	0.77	*	NS
GW-366 x HI-1544	11.4107		10.5167	11.2647		0.894	0.146	0.146		8.50079	1.29609	1.29609	0.58	0.77	NS	NS		11.1	10.4		0.310667	1.01067		2.7988	9.71795		0.58	0.77	NS	NS		0.58	0.77	**	NS
GW-366 x GW-173	10.8533		10.5167	11.794		0.336667	-0.940667	-0.940667		3.20127	-7.97581	-7.97581	0.58	0.77	NS	**		11.1	10.4		-0.246667	0.453333		-2.22222	4.35897		0.58	0.77	NS	NS		0.58	0.77	NS	NS
GW-366 x GW-11	10.8827		10.5167	11.3473		0.366	-0.464667	-0.464667		3.48019	-4.09494	-4.09494	0.58	0.77	NS	NS		11.1	10.4		-0.217333	0.482667		-1.95796	4.64103		0.58	0.77	NS	NS		0.58	0.77	NS	*
GW-366 x HD-2864	11.1467		10.5167	10.92		0.63	0.226667	0.226667		5.99049	2.0757	2.0757	0.58	0.77	NS	NS		11.1	10.4		0.0466667	0.746667		0.42042	7.17949		0.58	0.77	NS	NS		0.58	0.77	*	*
GW-366 x USA-385	11.3833		10.5167	10.9433		0.866667	0.44	0.44		8.24089	4.02071	4.02071	0.58	0.77	NS	NS		11.1	10.4		0.283333	0.983333		2.55255	9.45513		0.58	0.77	NS	NS		0.58	0.77	**	**
HI-1544 x GW-173	11.7627		11.2647	11.794		0.498	-0.0313333	-0.0313333		4.4209	-0.265672	-0.265672	0.58	0.77	NS	NS		11.1	10.4		0.662667	1.36267		5.96997	13.1026		0.58	0.77	*	*		0.58	0.77	**	NS
HI-1544 x GW-11	10.7653		11.2647	11.3473		-0.499333	-0.582	-0.582		-4.43274	-5.12896	-5.12896	0.58	0.77	NS	*		11.1	10.4		-0.334667	0.365333		-3.01502	3.51282		0.58	0.77	NS	NS		0.58	0.77	NS	**
HI-1544 x HD-2864	11.1467		11.2647	10.92		-0.118	0.226667	-0.118		-1.04752	2.0757	-1.04752	0.58	0.77	NS	NS		11.1	10.4		0.0466667	0.746667		0.42042	7.17949		0.58	0.77	NS	NS		0.58	0.77	*	*
HI-1544 x USA-385	11.0067		11.2647	10.9433		-0.258	0.0633333	-0.258		-2.29035	0.578739	-2.29035	0.58	0.77	NS	NS		11.1	10.4		-0.0933333	0.606667		-0.840841	5.83333		0.58	0.77	NS	NS		0.58	0.77	*	*
GW-173 x GW-11	11.2347		11.794	11.3473		-0.559333	-0.112667	-0.559333		-4.74252	-0.992891	-4.74252	0.58	0.77	NS	NS		11.1	10.4		0.134667	0.834667		1.21321	8.02564		0.58	0.77	NS	NS		0.58	0.77	**	NS
GW-173 x HD-2864	10.82		11.794	10.92		-0.974	-0.1	-0.974		-8.25844	-0.915751	-8.25844	0.58	0.77	NS	**		11.1	10.4		-0.28	0.42		-2.52252	4.03846		0.58	0.77	NS	NS		0.58	0.77	NS	NS
GW-173 x USA-385	10.9607		11.794	10.9433		-0.833333	0.0173333	-0.833333		-7.06574	0.158392	-7.06574	0.58	0.77	NS	**		11.1	10.4		-0.139333	0.560667		-1.25526	5.39103		0.58	0.77	NS	NS		0.58	0.77	NS	NS
GW-11 x HD-2864	11.1467		11.3473	10.92		-0.200667	0.226667	-0.200667		-1.7684	2.0757	-1.7684	0.58	0.77	NS	NS		11.1	10.4		0.0466667	0.746667		0.42042	7.17949		0.58	0.77	NS	NS		0.58	0.77	*	NS
GW-11 x USA-385	10.648		11.3473	10.9433		-0.699333	-0.295333	-0.699333		-6.16298	-2.69875	-6.16298	0.58	0.77	NS	*		11.1	10.4		-0.452	0.248		-4.07207	2.38462		0.58	0.77	NS	NS		0.58	0.77	NS	NS
HD-2864 x USA-385	10.5893		10.92	10.9433		-0.330667	-0.354	-0.354		-3.02808	-3.23485	-3.23485	0.58	0.77	NS	NS		11.1	10.4		-0.510667	0.189333		-4.6006	1.82051		0.58	0.77	NS	NS		0.58	0.77	NS	*
											max	10.7639											max	11.8258	19.3526
											min	-8.25844											min	-4.6006	1.82051
GW - 451 (P1)	10.4427
GW - 496 (P2)	10.4713
LOK-1 (P3)	11.2593
GW-322 (P4)	10.7833
GW-366 (P5)	10.5167
HI-1544 (P6)	11.2647
GW-173 (P7)	11.794
GW-11 (P8)	11.3473
HD-2864 (P9)	10.92
USA-385 (P10)	10.9433
