# Supplementary material for: Combining ability, heterosis and performance of grain yield and content of Fe, Zn and protein in bread wheat under normal and late sowing conditions
Source: PeerJ. 2023 Mar 9;11:e14971. doi: 10.7717/peerj.14971 (PMC10008312; doi:10.7717/peerj.14971)
Supplement: Supplemental Information 5 [file peerj-11-14971-s005.xlsx]

## Sheet: TS SOWN
	Sr. No.	Genotypes	1. Grain yield per plant (g)							Sr. No.	Genotypes	2. Protein Content (%)							Sr. No.	Genotypes	3. Iron (ppm)						Sr. No.	Genotypes	4. Zinc (ppm)
			R-I	R-II	R-III	Total	Mean					R-I	R-II	R-III	Total	Mean					R-I	R-II	R-III	Total	Mean				R-I	R-II	R-III	Total	Mean
	1	GW 451 x GW-496	22.599	18.884	18.38	59.863	19.9543			1	GW 451 x GW-496	10.648	10.7	10.61	31.958	10.6527			1	GW 451 x GW-496	26.36	25.4037	25.9	77.6637	25.8879		1	GW 451 x GW-496	10.72	11.23	11.56	33.51	11.17
	2	GW 451 x LOK-1	30.21	29.17	30.15	89.53	29.8433			2	GW 451 x LOK-1	10.384	10.384	10.32	31.088	10.3627			2	GW 451 x LOK-1	21.1	22.1885	21.7	64.9885	21.6628		2	GW 451 x LOK-1	9.7	9.87	9.77	29.34	9.78
	3	GW 451 x GW-322	34.23	31.0262	33.45	98.7062	32.9021			3	GW 451 x GW-322	10.208	9.944	10.3	30.452	10.1507			3	GW 451 x GW-322	23.2	25.3172	24.55	73.0672	24.3557		3	GW 451 x GW-322	8.87	9.72	9.26	27.85	9.28333
	4	GW 451 x GW-366	14.983	19.406	13.034	47.423	15.8077			4	GW 451 x GW-366	10.296	10.296	10	30.592	10.1973			4	GW 451 x GW-366	24.89	23.3681	24.46	72.7181	24.2394		4	GW 451 x GW-366	8.36	9.02748	8.98	26.3675	8.78916
	5	GW 451 x HI-1544	17.718	23.624	19.984	61.326	20.442			5	GW 451 x HI-1544	10.208	9.856	9.99	30.054	10.018			5	GW 451 x HI-1544	29.15	28.8169	29.31	87.2769	29.0923		5	GW 451 x HI-1544	9.3	9.7	9.45	28.45	9.48333
	6	GW 451 x GW-173	22.536	23.031	23.24	68.807	22.9357			6	GW 451 x GW-173	10.208	9.944	10.11	30.262	10.0873			6	GW 451 x GW-173	22.68	23.8916	23.11	69.6816	23.2272		6	GW 451 x GW-173	9.3	10.17	9.8	29.27	9.75667
	7	GW 451 x GW-11	18.83	14.044	18.64	51.514	17.1713			7	GW 451 x GW-11	9.856	9.944	9.91	29.71	9.90333			7	GW 451 x GW-11	26.4	27.6252	27.24	81.2652	27.0884		7	GW 451 x GW-11	8.96	9.02	9.04	27.02	9.00667
	8	GW 451 x HD-2864	16.03	16.322	16.92	49.272	16.424			8	GW 451 x HD-2864	10.384	10.384	10.21	30.978	10.326			8	GW 451 x HD-2864	31.01	28.6	30.29	89.9	29.9667		8	GW 451 x HD-2864	10.22	10.66	10.56	31.44	10.48
	9	GW 451 x USA-385	15.61	15.607	14.553	45.77	15.2567			9	GW 451 x USA-385	9.856	9.99	10.01	29.856	9.952			9	GW 451 x USA-385	25.03	27.6087	26.41	79.0487	26.3496		9	GW 451 x USA-385	10.48	10.87	10.43	31.78	10.5933
	10	GW-496 x LOK-1	17.248	10.483	13.132	40.863	13.621			10	GW-496 x LOK-1	10.648	10.55	10.25	31.448	10.4827			10	GW-496 x LOK-1	23.04	24.125	23.96	71.125	23.7083		10	GW-496 x LOK-1	9.96	9.68768	9.98	29.6277	9.87589
	11	GW-496 x GW-322	11.346	14.71	11.385	37.441	12.4803			11	GW-496 x GW-322	11.264	11.32	11.2	33.784	11.2613			11	GW-496 x GW-322	27.05	27.0746	27.48	81.6046	27.2015		11	GW-496 x GW-322	10.13	10.27	10.11	30.51	10.17
	12	GW-496 x GW-366	16.13	16.896	16.781	49.807	16.6023			12	GW-496 x GW-366	10.208	10.25	10.3	30.758	10.2527			12	GW-496 x GW-366	22.47	23.5992	23.43	69.4992	23.1664		12	GW-496 x GW-366	10.12	9.23114	9.79	29.1411	9.71371
	13	GW-496 x HI-1544	12.38	11.619	15.51	39.509	13.1697			13	GW-496 x HI-1544	10.296	10.25	10.34	30.886	10.2953			13	GW-496 x HI-1544	22.32	21.1189	22.19	65.6289	21.8763		13	GW-496 x HI-1544	10.47	10.12	9.53	30.12	10.04
	14	GW-496 x GW-173	14.29	13.24	11.14	38.67	12.89			14	GW-496 x GW-173	10.296	9.99	10.2	30.486	10.162			14	GW-496 x GW-173	42.25	41.0311	41.36	124.641	41.547		14	GW-496 x GW-173	14.48	14.1	13.65	42.23	14.0767
	15	GW-496 x GW-11	18.01	19.798	19.45	57.258	19.086			15	GW-496 x GW-11	10.736	10.9	11.03	32.666	10.8887			15	GW-496 x GW-11	24.54	25.685	25.44	75.665	25.2217		15	GW-496 x GW-11	9.4	9.22766	9.25	27.8777	9.29255
	16	GW-496 x HD-2864	16.502	19.449	15.979	51.93	17.31			16	GW-496 x HD-2864	11.088	11.2	11.1	33.388	11.1293			16	GW-496 x HD-2864	23.64	26.0055	25.19	74.8355	24.9452		16	GW-496 x HD-2864	8.91	9.82838	9.45	28.1884	9.39613
	17	GW-496 x USA-385	14.24	16.829	18.161	49.23	16.41			17	GW-496 x USA-385	10.824	10.9	11.02	32.744	10.9147			17	GW-496 x USA-385	28.34	27.1221	27.85	83.3121	27.7707		17	GW-496 x USA-385	10.84	10.41	10.78	32.03	10.6767
	18	LOK-1 x GW-322	19.933	26.104	19.277	65.314	21.7713			18	LOK-1 x GW-322	11.176	11.3	11.25	33.726	11.242			18	LOK-1 x GW-322	25.71	26.6781	26.24	78.6281	26.2094		18	LOK-1 x GW-322	10.4	9.93203	10.16	30.492	10.164
	19	LOK-1 x GW-366	21.34	21.124	21.557	64.021	21.3403			19	LOK-1 x GW-366	9.856	10.01	9.8	29.666	9.88867			19	LOK-1 x GW-366	26.5	27.8151	27.32	81.6351	27.2117		19	LOK-1 x GW-366	10.07	10.32	10.52	30.91	10.3033
	20	LOK-1 x HI-1544	22.45	22.31	21.655	66.415	22.1383			20	LOK-1 x HI-1544	11.176	11.088	11.15	33.414	11.138			20	LOK-1 x HI-1544	31.63	29.32	30.57	91.52	30.5067		20	LOK-1 x HI-1544	10.38	10.65	11.06	32.09	10.6967
	21	LOK-1 x GW-173	16.7	17.41	16.05	50.16	16.72			21	LOK-1 x GW-173	11.264	11.35	11.32	33.934	11.3113			21	LOK-1 x GW-173	28.57	29.0916	28.63	86.2916	28.7639		21	LOK-1 x GW-173	10.69	10.42	10.15	31.26	10.42
	22	LOK-1 x GW-11	13.66	12.65	13.684	39.994	13.3313			22	LOK-1 x GW-11	11.088	10.98	10.78	32.848	10.9493			22	LOK-1 x GW-11	25.76	24.7285	25.23	75.7185	25.2395		22	LOK-1 x GW-11	10.68	9.94745	10.23	30.8575	10.2858
	23	LOK-1 x HD-2864	12.56	12.161	12.478	37.199	12.3997			23	LOK-1 x HD-2864	11.528	11.48	11.6	34.608	11.536			23	LOK-1 x HD-2864	25.39	25.9895	25.55	76.9295	25.6432		23	LOK-1 x HD-2864	11.34	10.67	10.9	32.91	10.97
	24	LOK-1 x USA-385	16.24	13.56	14.075	43.875	14.625			24	LOK-1 x USA-385	10.912	11.02	10.96	32.892	10.964			24	LOK-1 x USA-385	24.58	25.6633	25.13	75.3733	25.1244		24	LOK-1 x USA-385	10.69	9.16691	10.11	29.9669	9.98897
	25	GW-322 x GW-366	18.45	17.361	18.24	54.051	18.017			25	GW-322 x GW-366	11.264	11.35	11.4	34.014	11.338			25	GW-322 x GW-366	27.74	24.4665	26.59	78.7965	26.2655		25	GW-322 x GW-366	10.06	10.4513	10.25	30.7613	10.2538
	26	GW-322 x HI-1544	23.79	26.644	25.79	76.224	25.408			26	GW-322 x HI-1544	11.616	11.528	11.82	34.964	11.6547			26	GW-322 x HI-1544	22.91	25.8867	24.67	73.4667	24.4889		26	GW-322 x HI-1544	12.38	11.97	12.45	36.8	12.2667
	27	GW-322 x GW-173	19.651	16.99	19.31	55.951	18.6503			27	GW-322 x GW-173	10.824	10.98	10.68	32.484	10.828			27	GW-322 x GW-173	24.5	25.7145	25.44	75.6545	25.2182		27	GW-322 x GW-173	10.56	9.72434	10.25	30.5343	10.1781
	28	GW-322 x GW-11	16.06	23.62	20.08	59.76	19.92			28	GW-322 x GW-11	10.736	11.04	11	32.776	10.9253			28	GW-322 x GW-11	28.58	27.54	28.09	84.21	28.07		28	GW-322 x GW-11	10.24	9.91	9.87	30.02	10.0067
	29	GW-322 x HD-2864	12.708	18.51	12.366	43.584	14.528			29	GW-322 x HD-2864	11.176	11.3	11.1	33.576	11.192			29	GW-322 x HD-2864	25.72	23.2801	24.63	73.6301	24.5434		29	GW-322 x HD-2864	11.34	10.2	10.05	31.59	10.53
	30	GW-322 x USA-385	14.908	14.87	13.853	43.631	14.5437			30	GW-322 x USA-385	11.704	11.9	11.3	34.904	11.6347			30	GW-322 x USA-385	28.05	27.54	27.95	83.54	27.8467		30	GW-322 x USA-385	11.61	9.24	10.87	31.72	10.5733
	31	GW-366 x HI-1544	18.824	18.49	12.539	49.853	16.6177			31	GW-366 x HI-1544	11.264	11.3	11.4	33.964	11.3213			31	GW-366 x HI-1544	26.18	23.8356	25.03	75.0456	25.0152		31	GW-366 x HI-1544	10.34	10.47	10.69	31.5	10.5
	32	GW-366 x GW-173	10.0498	10.422	11.5	31.9718	10.6573			32	GW-366 x GW-173	10.648	10.8	11.02	32.468	10.8227			32	GW-366 x GW-173	31.44	32.12	31.86	95.42	31.8067		32	GW-366 x GW-173	10.94	11.11	11.69	33.74	11.2467
	33	GW-366 x GW-11	14.2344	13.35	14.23	41.8144	13.9381			33	GW-366 x GW-11	10.912	10.98	10.68	32.572	10.8573			33	GW-366 x GW-11	22.28	23.7762	23.12	69.1762	23.0587		33	GW-366 x GW-11	12.04	12.51	11.9	36.45	12.15
	34	GW-366 x HD-2864	17.36	18.196	15.862	51.418	17.1393			34	GW-366 x HD-2864	10.824	11.2	10.97	32.994	10.998			34	GW-366 x HD-2864	22.32	23.1277	22.89	68.3377	22.7792		34	GW-366 x HD-2864	9.97	10.56	10.03	30.56	10.1867
	35	GW-366 x USA-385	14.817	13.463	14.45	42.73	14.2433			35	GW-366 x USA-385	10.208	10.3	10.41	30.918	10.306			35	GW-366 x USA-385	26.1	25.12	24.32	75.54	25.18		35	GW-366 x USA-385	10.1	9.60707	9.98	29.6871	9.89569
	36	HI-1544 x GW-173	12.2633	13.1112	9.542	34.9165	11.6388			36	HI-1544 x GW-173	10.912	10.87	10.99	32.772	10.924			36	HI-1544 x GW-173	31.78	30.12	30.63	92.53	30.8433		36	HI-1544 x GW-173	14.85	15.74	15.47	46.06	15.3533
	37	HI-1544 x GW-11	12.741	13.538	11.03	37.309	12.4363			37	HI-1544 x GW-11	10.032	10	9.98	30.012	10.004			37	HI-1544 x GW-11	23.34	26.4997	25.11	74.9497	24.9832		37	HI-1544 x GW-11	9.04	8.71	8.58	26.33	8.77667
	38	HI-1544 x HD-2864	15.591	17.56	14.36	47.511	15.837			38	HI-1544 x HD-2864	10.472	10.39	10.5	31.362	10.454			38	HI-1544 x HD-2864	27.97	28.12	28.21	84.3	28.1		38	HI-1544 x HD-2864	11.24	11.2	11.12	33.56	11.1867
	39	HI-1544 x USA-385	16.97	15.256	14.75	46.976	15.6587			39	HI-1544 x USA-385	10.12	10.21	10.3	30.63	10.21			39	HI-1544 x USA-385	24.35	26.9832	25.74	77.0732	25.6911		39	HI-1544 x USA-385	10.97	11.67	10.8	33.44	11.1467
	40	GW-173 x GW-11	12.34	10.614	15.27	38.224	12.7413			40	GW-173 x GW-11	10.736	10.87	10.85	32.456	10.8187			40	GW-173 x GW-11	23.19	23.4503	23.19	69.8303	23.2768		40	GW-173 x GW-11	11.44	11.97	11.85	35.26	11.7533
	41	GW-173 x HD-2864	10.44	11.279	14.23	35.949	11.983			41	GW-173 x HD-2864	10.648	10.68	10.78	32.108	10.7027			41	GW-173 x HD-2864	21.55	23.0678	22.63	67.2478	22.4159		41	GW-173 x HD-2864	12.15	12.24	12.03	36.42	12.14
	42	GW-173 x USA-385	11.979	12.284	9.13	33.393	11.131			42	GW-173 x USA-385	10.648	10.56	10.78	31.988	10.6627			42	GW-173 x USA-385	26.78	24.8568	25.78	77.4168	25.8056		42	GW-173 x USA-385	12.34	12.54	12.25	37.13	12.3767
	43	GW-11 x HD-2864	13.908	15.84	14.94	44.688	14.896			43	GW-11 x HD-2864	9.856	9.8	9.93	29.586	9.862			43	GW-11 x HD-2864	25.33	25.2062	25.24	75.7762	25.2587		43	GW-11 x HD-2864	12.26	11.52	11.35	35.13	11.71
	44	GW-11 x USA-385	13.54	13.91	13.741	41.191	13.7303			44	GW-11 x USA-385	10.032	10.1	10.05	30.182	10.0607			44	GW-11 x USA-385	24.14	25.6574	25.03	74.8274	24.9425		44	GW-11 x USA-385	10.93	10.24	10.56	31.73	10.5767
	45	HD-2864 x USA-385	11.878	9.17	8.88	29.928	9.976			45	HD-2864 x USA-385	10.824	10.63	10.9	32.354	10.7847			45	HD-2864 x USA-385	25.2	23.3684	24.56	73.1284	24.3761		45	HD-2864 x USA-385	11.67	12.11	11.58	35.36	11.7867
	46	GW - 451 (P1)	14.315	16.193	14.554	45.062	15.0207			46	GW - 451 (P1)	11.44	11.45	11.6	34.49	11.4967			46	GW - 451 (P1)	21.58	22.7229	22.24	66.5429	22.181		46	GW - 451 (P1)	11.35	11.15	11.85	34.35	11.45
	47	GW - 496 (P2)	15.435	12.933	14.296	42.664	14.2213			47	GW - 496 (P2)	11.176	11.3	11.25	33.726	11.242			47	GW - 496 (P2)	28.23	29.2578	28.69	86.1778	28.7259		47	GW - 496 (P2)	11.3	11.16	10.89	33.35	11.1167
	48	LOK-1 (P3)	19.346	22.34	23.45	65.136	21.712			48	LOK-1 (P3)	12.144	12.2	12.03	36.374	12.1247			48	LOK-1 (P3)	28.2	27.5215	27.63	83.3515	27.7838		48	LOK-1 (P3)	11.73	11.23	11.56	34.52	11.5067
	49	GW-322 (P4)	20.97	15.05	15.619	51.639	17.213			49	GW-322 (P4)	11.352	11.3	11.4	34.052	11.3507			49	GW-322 (P4)	23.5	23.7756	23.45	70.7256	23.5752		49	GW-322 (P4)	11.26	11.77	11.57	34.6	11.5333
	50	GW-366 (P5)	16.569	17.063	18.248	51.88	17.2933			50	GW-366 (P5)	10.824	10.9	10.95	32.674	10.8913			50	GW-366 (P5)	22.16	23.5978	22.98	68.7378	22.9126		50	GW-366 (P5)	10.94	10.85	10.97	32.76	10.92
	51	HI-1544 (P6)	23.294	22.45	23.56	69.304	23.1013			51	HI-1544 (P6)	11.792	11.86	11.9	35.552	11.8507			51	HI-1544 (P6)	25.7	25.0733	25.45	76.2233	25.4078		51	HI-1544 (P6)	13.25	14.22	14.15	41.62	13.8733
	52	GW-173 (P7)	13.817	12.971	16.637	43.425	14.475			52	GW-173 (P7)	13.288	13.56	13.4	40.248	13.416			52	GW-173 (P7)	28.65	28.7306	28.71	86.0906	28.6969		52	GW-173 (P7)	12.38	13.06	13.35	38.79	12.93
	53	GW-11 (P8)	17.063	16.676	16.193	49.932	16.644			53	GW-11 (P8)	12.848	12.96	13	38.808	12.936			53	GW-11 (P8)	30.49	32.12	31.45	94.06	31.3533		53	GW-11 (P8)	11.87	11.88	11.69	35.44	11.8133
	54	HD-2864 (P9)	17.091	16.853	15.663	49.607	16.5357			54	HD-2864 (P9)	12.144	12.25	12.3	36.694	12.2313			54	HD-2864 (P9)	33.25	35.4139	34.65	103.314	34.438		54	HD-2864 (P9)	10.74	10.45	10.78	31.97	10.6567
	55	USA-385 (P10)	17.483	14.374	14.795	46.652	15.5507			55	USA-385 (P10)	10.56	10.69	10.63	31.88	10.6267			55	USA-385 (P10)	23.15	23.14	23.26	69.55	23.1833		55	USA-385 (P10)	9.66	8.64146	9.78	28.0815	9.36049
	56	MACS-6222-TS (C )	15.476	18.251	15.643	49.37	16.4567			56	MACS-6222-TS (C )	11.616	11.65	11.78	35.046	11.682			56	MACS-6222-TS (C )	27.18	24.34	25.86	77.38	25.7933		56	MACS-6222-TS (C )	10.57	10.87	11.06	32.5	10.8333
	57	HD-2932-LS (C )	17.098	16.24	20.732	54.07	18.0233			57	HD-2932-LS (C )	9.68	9.7	9.8	29.18	9.72667			57	HD-2932-LS (C )	18.34	17.7331	19.45	55.5231	18.5077		57	HD-2932-LS (C )	11.02	10.37	10.67	32.06	10.6867

## Sheet: LS SOWN
	Sr. No.	Genotypes	1. Grain yield per plant (g)							Sr. No.	Genotypes	2. Protein Content (%)									3. Iron (ppm)								4. Zinc (ppm)
																			Sr. No.	Genotypes							Sr. No.	Genotypes
			R-I	R-II	R-III	Total	Mean					R-I	R-II	R-III	Total	Mean					R-I	R-II	R-III	Total	Mean				R-I	R-II	R-III	Total	Mean
	1	GW 451 x GW-496	16.13	17.07	14.95	48.15	16.05			1	GW 451 x GW-496	11.176	11.7	11.62	34.496	11.4987			1	GW 451 x GW-496	27.81	26.83	27.26	54.64	27.3		1	GW 451 x GW-496	10.54	10.29	10.49	20.83	10.44
	2	GW 451 x LOK-1	21	20.26	19.32	60.58	20.1933			2	GW 451 x LOK-1	11.704	11.968	11.88	35.552	11.8507			2	GW 451 x LOK-1	29.33	29.76	29.63	59.09	29.5733		2	GW 451 x LOK-1	10.88	10.02	10.49	20.9	10.4633
	3	GW 451 x GW-322	20.985	26.15	21.81	68.945	22.9817			3	GW 451 x GW-322	11.968	11.9	11.88	35.748	11.916			3	GW 451 x GW-322	34.29	32.87	33.45	67.16	33.5367		3	GW 451 x GW-322	11.1	10.82	11.47	21.92	11.13
	4	GW 451 x GW-366	18	16.71	14.51	49.22	16.4067			4	GW 451 x GW-366	12.056	11.19	11.7	34.946	11.6487			4	GW 451 x GW-366	29.82	30.32	30.04	60.14	30.06		4	GW 451 x GW-366	11.2	10.67	11.06	21.87	10.9767
	5	GW 451 x HI-1544	16.55	21.5	16.33	54.38	18.1267			5	GW 451 x HI-1544	12.76	11.97	12.1	36.83	12.2767			5	GW 451 x HI-1544	30.75	33.22	32.56	63.97	32.1767		5	GW 451 x HI-1544	11.28	10.46	10.95	21.74	10.8967
	6	GW 451 x GW-173	24.32	24.54	22.56	71.42	23.8067			6	GW 451 x GW-173	11.52	11.49	11.44	34.45	11.4833			6	GW 451 x GW-173	31.21	30.91	30.89	62.12	31.0033		6	GW 451 x GW-173	11.56	11.42	11.52	22.98	11.5
	7	GW 451 x GW-11	15.28	10.11	15.44	40.83	13.61			7	GW 451 x GW-11	11.176	11.2	11.15	33.526	11.1753			7	GW 451 x GW-11	32.05	30.41	31.11	62.46	31.19		7	GW 451 x GW-11	10.66	10.66	10.78	21.32	10.7
	8	GW 451 x HD-2864	34	28.88	33.53	96.41	32.1367			8	GW 451 x HD-2864	11.792	11.704	11.264	34.76	11.5867			8	GW 451 x HD-2864	34.48	36.59	35.5	71.07	35.5233		8	GW 451 x HD-2864	11.36	10.9	11.23	22.26	11.1633
	9	GW 451 x USA-385	24.15	28.98	24.44	77.57	25.8567			9	GW 451 x USA-385	10.47	10.56	10.912	31.942	10.6473			9	GW 451 x USA-385	33.83	36.22	34.69	70.05	34.9133		9	GW 451 x USA-385	12.47	11.38	12.14	23.85	11.9967
	10	GW-496 x LOK-1	10.99	13.88	13.45	38.32	12.7733			10	GW-496 x LOK-1	11.088	11.44	11.088	33.616	11.2053			10	GW-496 x LOK-1	34.84	32.37	33.74	67.21	33.65		10	GW-496 x LOK-1	11.76	11.85	11.91	23.61	11.84
	11	GW-496 x GW-322	23.73	18.03	23	64.76	21.5867			11	GW-496 x GW-322	10.824	11.176	11	33	11			11	GW-496 x GW-322	26.84	25.64	26.3	52.48	26.26		11	GW-496 x GW-322	11.64	12.56	12.1	24.2	12.1
	12	GW-496 x GW-366	18.34	23.25	19.45	61.04	20.3467			12	GW-496 x GW-366	11.264	11.704	11.792	34.76	11.5867			12	GW-496 x GW-366	27.59	24.49	25.98	52.08	26.02		12	GW-496 x GW-366	11.91	11.97	12.03	23.88	11.97
	13	GW-496 x HI-1544	21.22	16.44	20.32	57.98	19.3267			13	GW-496 x HI-1544	11.176	11.616	11.616	34.408	11.4693			13	GW-496 x HI-1544	30.34	29.75	30	60.09	30.03		13	GW-496 x HI-1544	11.23	9.55	10.47	20.78	10.4167
	14	GW-496 x GW-173	15	13.12	11.93	40.05	13.35			14	GW-496 x GW-173	11	11.33	11.21	33.54	11.18			14	GW-496 x GW-173	26.3	27.3	26.98	53.6	26.86		14	GW-496 x GW-173	10.89	10.68	10.87	21.57	10.8133
	15	GW-496 x GW-11	24.23	22.718	19.8	66.748	22.2493			15	GW-496 x GW-11	11.264	11	11.264	33.528	11.176			15	GW-496 x GW-11	30.06	26.52	28.31	56.58	28.2967		15	GW-496 x GW-11	9.35	9.73	9.65	19.08	9.57667
	16	GW-496 x HD-2864	13.89	16.76	16.13	46.78	15.5933			16	GW-496 x HD-2864	11.264	11.44	11.44	34.144	11.3813			16	GW-496 x HD-2864	31.21	33.4	32.21	64.61	32.2733		16	GW-496 x HD-2864	10.27	10.59	10.02	20.86	10.2933
	17	GW-496 x USA-385	15.156	13.821	18.916	47.893	15.9643			17	GW-496 x USA-385	11.088	11.264	11.352	33.704	11.2347			17	GW-496 x USA-385	26.52	27.22	26.9	53.74	26.88		17	GW-496 x USA-385	11.57	10.03	10.98	21.6	10.86
	18	LOK-1 x GW-322	14.832	14.495	12.041	41.368	13.7893			18	LOK-1 x GW-322	11.352	12.35	10.44	34.142	11.3807			18	LOK-1 x GW-322	26.63	27.27	26.9	53.9	26.9333		18	LOK-1 x GW-322	9.55	9.31	9.56	18.86	9.47333
	19	LOK-1 x GW-366	10.907	16.355	12.222	39.484	13.1613			19	LOK-1 x GW-366	10.736	11.264	11.44	33.44	11.1467			19	LOK-1 x GW-366	25.72	26.18	25.9	51.9	25.9333		19	LOK-1 x GW-366	10.15	9.91	10	20.06	10.02
	20	LOK-1 x HI-1544	18.569	17.1	15.22	50.889	16.963			20	LOK-1 x HI-1544	12.53	10.53	11.528	34.588	11.5293			20	LOK-1 x HI-1544	25.75	28.67	27.23	54.42	27.2167		20	LOK-1 x HI-1544	10.07	8.73	9.45	18.8	9.41667
	21	LOK-1 x GW-173	14.23	18.14	16.336	48.706	16.2353			21	LOK-1 x GW-173	11.2	11.29	11.3	33.79	11.2633			21	LOK-1 x GW-173	26.64	28.39	27.5	55.03	27.51		21	LOK-1 x GW-173	13	11.61	12.35	24.61	12.32
	22	LOK-1 x GW-11	12.175	12.242	7.101	31.518	10.506			22	LOK-1 x GW-11	12.408	12.56	12.27	37.238	12.4127			22	LOK-1 x GW-11	27.12	28.86	28.12	55.98	28.0333		22	LOK-1 x GW-11	12.2	10.82	11.64	23.02	11.5533
	23	LOK-1 x HD-2864	28.32	20.72	20.811	69.851	23.2837			23	LOK-1 x HD-2864	11.528	11.616	11.616	34.76	11.5867			23	LOK-1 x HD-2864	25.37	26.85	26.06	52.22	26.0933		23	LOK-1 x HD-2864	11.91	10.22	11.1	22.13	11.0767
	24	LOK-1 x USA-385	35.78	34.42	36.14	106.34	35.4467			24	LOK-1 x USA-385	10.648	10.384	10.824	31.856	10.6187			24	LOK-1 x USA-385	26.21	27.75	26.22	53.96	26.7267		24	LOK-1 x USA-385	11.72	12.87	12.45	24.59	12.3467
	25	GW-322 x GW-366	13.73	15.45	12.12	41.3	13.7667			25	GW-322 x GW-366	10.12	11	11	32.12	10.7067			25	GW-322 x GW-366	27.45	25.26	26.23	52.71	26.3133		25	GW-322 x GW-366	11.32	11.86	11.68	23.18	11.62
	26	GW-322 x HI-1544	16	15	17.71	48.71	16.2367			26	GW-322 x HI-1544	10.736	10.736	10.736	32.208	10.736			26	GW-322 x HI-1544	31.8	33.69	32.12	65.49	32.5367		26	GW-322 x HI-1544	11.66	13.01	12.47	24.67	12.38
	27	GW-322 x GW-173	8.76	11.09	8.23	28.08	9.36			27	GW-322 x GW-173	11.11	11.264	11.4	33.774	11.258			27	GW-322 x GW-173	28.94	29.61	30.14	58.55	29.5633		27	GW-322 x GW-173	13.27	13.78	13.85	27.05	13.6333
	28	GW-322 x GW-11	11.472	16.978	14.869	43.319	14.4397			28	GW-322 x GW-11	10.56	11.088	11.352	33	11			28	GW-322 x GW-11	30.09	32.13	31.21	62.22	31.1433		28	GW-322 x GW-11	9.55	10.84	10.35	20.39	10.2467
	29	GW-322 x HD-2864	18.26	19.43	14.91	52.6	17.5333			29	GW-322 x HD-2864	10.824	11.088	11.176	33.088	11.0293			29	GW-322 x HD-2864	33.23	29.79	31.65	63.02	31.5567		29	GW-322 x HD-2864	11.39	12.24	11.98	23.63	11.87
	30	GW-322 x USA-385	22.41	19.98	18.5	60.89	20.2967			30	GW-322 x USA-385	10.912	11.176	11.088	33.176	11.0587			30	GW-322 x USA-385	27.56	30.29	29.45	57.85	29.1		30	GW-322 x USA-385	11.23	11.8	11.65	23.03	11.56
	31	GW-366 x HI-1544	11.14	14.69	10.37	36.2	12.0667			31	GW-366 x HI-1544	11.528	11.44	11.264	34.232	11.4107			31	GW-366 x HI-1544	33.8	30.68	32.41	64.48	32.2967		31	GW-366 x HI-1544	13.63	12.34	13.1	25.97	13.0233
	32	GW-366 x GW-173	15	17.55	18.79	51.34	17.1133			32	GW-366 x GW-173	10.736	10.912	10.912	32.56	10.8533			32	GW-366 x GW-173	32.97	30.43	31.94	63.4	31.78		32	GW-366 x GW-173	13.23	12.43	12.98	25.66	12.88
	33	GW-366 x GW-11	19	18	15.11	52.11	17.37			33	GW-366 x GW-11	11	11.176	10.472	32.648	10.8827			33	GW-366 x GW-11	25.14	27.4	26.34	52.54	26.2933		33	GW-366 x GW-11	11.17	11.48	11.42	22.65	11.3567
	34	GW-366 x HD-2864	25.12	20.43	24.253	69.803	23.2677			34	GW-366 x HD-2864	10.824	11.264	11.352	33.44	11.1467			34	GW-366 x HD-2864	20.47	23.85	22.47	44.32	22.2633		34	GW-366 x HD-2864	12.99	11.98	12.58	24.97	12.5167
	35	GW-366 x USA-385	14.57	16	14	44.57	14.8567			35	GW-366 x USA-385	12.35	11.41	10.39	34.15	11.3833			35	GW-366 x USA-385	33.94	32.64	33.47	66.58	33.35		35	GW-366 x USA-385	11.37	12.79	12.1	24.16	12.0867
	36	HI-1544 x GW-173	19.8	23.68	23.553	67.033	22.3443			36	HI-1544 x GW-173	11.792	11.704	11.792	35.288	11.7627			36	HI-1544 x GW-173	35.58	34.57	35	70.15	35.05		36	HI-1544 x GW-173	10.63	11	10.98	21.63	10.87
	37	HI-1544 x GW-11	16.88	19.577	17.231	53.688	17.896			37	HI-1544 x GW-11	10.472	10.824	11	32.296	10.7653			37	HI-1544 x GW-11	35.75	36.3	36.07	72.05	36.04		37	HI-1544 x GW-11	9.11	10.19	9.75	19.3	9.68333
	38	HI-1544 x HD-2864	16.11	17.55	18.34	52	17.3333			38	HI-1544 x HD-2864	10.648	11.616	11.176	33.44	11.1467			38	HI-1544 x HD-2864	21.6	24.38	23.1	45.98	23.0267		38	HI-1544 x HD-2864	10.38	10.84	10.75	21.22	10.6567
	39	HI-1544 x USA-385	14.531	12.991	16.116	43.638	14.546			39	HI-1544 x USA-385	10.912	11.088	11.02	33.02	11.0067			39	HI-1544 x USA-385	27.71	28.19	28.14	55.9	28.0133		39	HI-1544 x USA-385	10.78	10.96	10.89	21.74	10.8767
	40	GW-173 x GW-11	13.795	11.741	16.93	42.466	14.1553			40	GW-173 x GW-11	11	11.352	11.352	33.704	11.2347			40	GW-173 x GW-11	28.84	28.43	28.87	57.27	28.7133		40	GW-173 x GW-11	11.6	12.52	12.1	24.12	12.0733
	41	GW-173 x HD-2864	16.86	15.34	13.45	45.65	15.2167			41	GW-173 x HD-2864	11.02	10.46	10.98	32.46	10.82			41	GW-173 x HD-2864	29.01	27.75	28.47	56.76	28.41		41	GW-173 x HD-2864	13.21	13.57	13.49	26.78	13.4233
	42	GW-173 x USA-385	10.012	10.873	9.146	30.031	10.0103			42	GW-173 x USA-385	10.912	11.88	10.09	32.882	10.9607			42	GW-173 x USA-385	30.76	27.96	29.47	58.72	29.3967		42	GW-173 x USA-385	14.11	14.35	14.33	28.46	14.2633
	43	GW-11 x HD-2864	13.28	17	15.21	45.49	15.1633			43	GW-11 x HD-2864	10.56	11.264	11.616	33.44	11.1467			43	GW-11 x HD-2864	31.62	32.48	32.14	64.1	32.08		43	GW-11 x HD-2864	11.91	12.89	12.45	24.8	12.4167
	44	GW-11 x USA-385	14	15	12.78	41.78	13.9267			44	GW-11 x USA-385	10.208	10.736	11	31.944	10.648			44	GW-11 x USA-385	27.12	26.71	26.97	53.83	26.9333		44	GW-11 x USA-385	11.95	12.52	12.34	24.47	12.27
	45	HD-2864 x USA-385	18.75	21.76	20.12	60.63	20.21			45	HD-2864 x USA-385	10.648	10.384	10.736	31.768	10.5893			45	HD-2864 x USA-385	26.38	25.41	25.93	51.79	25.9067		45	HD-2864 x USA-385	14	15.16	14.68	29.16	14.6133
	46	GW - 451 (P1)	20.445	20.7484	19.6366	60.83	20.2767			46	GW - 451 (P1)	10.208	10.648	10.472	31.328	10.4427			46	GW - 451 (P1)	25.26	24.18	24.87	49.44	24.77		46	GW - 451 (P1)	14.22	15.4	14.97	29.62	14.8633
	47	GW - 496 (P2)	20.1973	23.9071	19.2528	63.3572	21.1191			47	GW - 496 (P2)	10.384	10.58	10.45	31.414	10.4713			47	GW - 496 (P2)	26.99	25.54	26.32	52.53	26.2833		47	GW - 496 (P2)	13.47	14.52	14.1	27.99	14.03
	48	LOK-1 (P3)	26.9438	25.2606	28.0784	80.2829	26.761			48	LOK-1 (P3)	11.25	11.176	11.352	33.778	11.2593			48	LOK-1 (P3)	28.31	28.03	28.19	56.34	28.1767		48	LOK-1 (P3)	12.26	13.03	12.74	25.29	12.6767
	49	GW-322 (P4)	21.0546	25.7999	26.244	73.0986	24.3662			49	GW-322 (P4)	10.37	11	10.98	32.35	10.7833			49	GW-322 (P4)	24.05	24.3	24.24	48.35	24.1967		49	GW-322 (P4)	12.58	13.19	12.9	25.77	12.89
	50	GW-366 (P5)	31.0272	31.5806	33.9255	96.5333	32.1778			50	GW-366 (P5)	10.51	10.4	10.64	31.55	10.5167			50	GW-366 (P5)	32.1	34.42	33.28	66.52	33.2667		50	GW-366 (P5)	12.9	13.84	13.47	26.74	13.4033
	51	HI-1544 (P6)	25.0517	26.339	22.7429	74.1337	24.7112			51	HI-1544 (P6)	11.21	11.264	11.32	33.794	11.2647			51	HI-1544 (P6)	29.06	25.43	27.26	54.49	27.25		51	HI-1544 (P6)	12.63	12.19	12.54	24.82	12.4533
	52	GW-173 (P7)	17.5041	18.515	20.8908	56.9099	18.97			52	GW-173 (P7)	11.94	11.792	11.65	35.382	11.794			52	GW-173 (P7)	32	30.49	31.35	62.49	31.28		52	GW-173 (P7)	13.33	13.24	13.33	26.57	13.3
	53	GW-11 (P8)	16.5936	17.553	15.8242	49.9708	16.6569			53	GW-11 (P8)	11.44	11.352	11.25	34.042	11.3473			53	GW-11 (P8)	29.29	28.28	28.87	57.57	28.8133		53	GW-11 (P8)	12.97	14.36	13.71	27.33	13.68
	54	HD-2864 (P9)	21.3903	19.6596	19.248	60.2979	20.0993			54	HD-2864 (P9)	10.98	10.78	11	32.76	10.92			54	HD-2864 (P9)	33.88	32.45	33.19	66.33	33.1733		54	HD-2864 (P9)	13.02	14.06	13.59	27.08	13.5567
	55	USA-385 (P10)	16.1559	15.7421	17.39	49.288	16.4293			55	USA-385 (P10)	10.97	11.91	9.95	32.83	10.9433			55	USA-385 (P10)	30.51	31.99	31.26	62.5	31.2533		55	USA-385 (P10)	13.69	13.68	13.74	27.37	13.7033
	56	MACS-6222-TS (C )	19.7285	23.8253	20.5092	64.063	21.3543			56	MACS-6222-TS (C )	11.01	11.088	11.14	33.238	11.0793			56	MACS-6222-TS (C )	27.61	27	27.34	54.61	27.3167		56	MACS-6222-TS (C )	15.45	14.43	14.1	29.88	14.66
	57	HD-2932-LS (C )	25.22	28.9929	28.55	82.7629	27.5876			57	HD-2932-LS (C )	10.45	10.56	10.208	31.218	10.406			57	HD-2932-LS (C )	26.75	26.61	26.78	53.36	26.7133		57	HD-2932-LS (C )	14.26	13	13.74	27.26	13.6667
