# Supplementary material for: Combining ability, heterosis and performance of grain yield and content of Fe, Zn and protein in bread wheat under normal and late sowing conditions
Source: PeerJ. 2023 Mar 9;11:e14971. doi: 10.7717/peerj.14971 (PMC10008312; doi:10.7717/peerj.14971)
Supplement: Supplemental Information 6 — Zinc content. [file peerj-11-14971-s006.xlsx]

## Sheet: E1 
			HETEROBELTIOSIS															STANDARD HETEROSIS									SH1					SH2
	F 1		BP1	BP2		BP1 d	BP2 d	Final		BP1 %	BP2 %	Final	0.01	0.05	sign	final		CH1	CH2		SH1d	SH2 d		SH 1 %	SH 2 %		0.01	0.05	sign	final		0.01	0.05	sign	final
GW 451 x GW-496	11.17		11.45	11.1167		-0.28	0.0533333	-0.28		-2.44541	0.47976	-2.44541	0.58	0.77	NS	NS		10.8	10.7		0.37	0.47		3.42593	4.39252		0.58	0.77	NS	NS		0.58	0.77	NS	NS
GW 451 x LOK-1	9.78		11.45	11.5067		-1.67	-1.72667	-1.72667		-14.5852	-15.0058	-15.0058	0.58	0.77	NS	**		10.8	10.7		-1.02	-0.92		-9.44444	-8.59813		0.58	0.77	NS	**		0.58	0.77	NS	**
GW 451 x GW-322	9.28333		11.45	11.5333		-2.16667	-2.25	-2.25		-18.9229	-19.5087	-19.5087	0.58	0.77	NS	**		10.8	10.7		-1.51667	-1.41667		-14.0432	-13.2399		0.58	0.77	NS	**		0.58	0.77	NS	**
GW 451 x GW-366	8.78916		11.45	10.92		-2.66084	-2.13084	-2.66084		-23.2388	-19.5132	-23.2388	0.58	0.77	NS	**		10.8	10.7		-2.01084	-1.91084		-18.6189	-17.8583		0.58	0.77	NS	**		0.58	0.77	NS	**
GW 451 x HI-1544	9.48333		11.45	13.8733		-1.96667	-4.39	-4.39		-17.1761	-31.6434	-31.6434	0.58	0.77	NS	**		10.8	10.7		-1.31667	-1.21667		-12.1914	-11.3707		0.58	0.77	NS	**		0.58	0.77	NS	**
GW 451 x GW-173	9.75667		11.45	12.93		-1.69333	-3.17333	-3.17333		-14.7889	-24.5424	-24.5424	0.58	0.77	NS	**		10.8	10.7		-1.04333	-0.943333		-9.66049	-8.8162		0.58	0.77	NS	**		0.58	0.77	NS	**
GW 451 x GW-11	9.00667		11.45	11.8133		-2.44333	-2.80667	-2.80667		-21.3392	-23.7585	-23.7585	0.58	0.77	NS	**		10.8	10.7		-1.79333	-1.69333		-16.6049	-15.8255		0.58	0.77	NS	**		0.58	0.77	NS	**
GW 451 x HD-2864	10.48		11.45	10.6567		-0.97	-0.176667	-0.97		-8.47162	-1.6578	-8.47162	0.58	0.77	NS	**		10.8	10.7		-0.32	-0.22		-2.96296	-2.05607		0.58	0.77	NS	NS		0.58	0.77	NS	NS
GW 451 x USA-385	10.5933		11.45	9.36049		-0.856667	1.23285	-0.856667		-7.4818	13.1707	-7.4818	0.58	0.77	NS	**		10.8	10.7		-0.206667	-0.106667		-1.91358	-0.996885		0.58	0.77	NS	NS		0.58	0.77	NS	NS
GW-496 x LOK-1	9.87589		11.1167	11.5067		-1.24077	-1.63077	-1.63077		-11.1614	-14.1724	-14.1724	0.58	0.77	NS	**		10.8	10.7		-0.924106	-0.824106		-8.55653	-7.70192		0.58	0.77	NS	**		0.58	0.77	NS	**
GW-496 x GW-322	10.17		11.1167	11.5333		-0.946667	-1.36333	-1.36333		-8.51574	-11.8208	-11.8208	0.58	0.77	NS	**		10.8	10.7		-0.63	-0.53		-5.83333	-4.95327		0.58	0.77	NS	*		0.58	0.77	NS	NS
GW-496 x GW-366	9.71371		11.1167	10.92		-1.40295	-1.20629	-1.40295		-12.6203	-11.0466	-12.6203	0.58	0.77	NS	**		10.8	10.7		-1.08629	-0.986288		-10.0582	-9.21765		0.58	0.77	NS	**		0.58	0.77	NS	**
GW-496 x HI-1544	10.04		11.1167	13.8733		-1.07667	-3.83333	-3.83333		-9.68516	-27.6309	-27.6309	0.58	0.77	NS	**		10.8	10.7		-0.76	-0.66		-7.03704	-6.16822		0.58	0.77	NS	*		0.58	0.77	NS	*
GW-496 x GW-173	14.0767		11.1167	12.93		2.96	1.14667	1.14667		26.6267	8.86827	8.86827	0.58	0.77	**	**		10.8	10.7		3.27667	3.37667		30.3395	31.5576		0.58	0.77	**	**		0.58	0.77	**	**
GW-496 x GW-11	9.29255		11.1167	11.8133		-1.82411	-2.52078	-2.52078		-16.4088	-21.3384	-21.3384	0.58	0.77	NS	**		10.8	10.7		-1.50745	-1.40745		-13.9578	-13.1537		0.58	0.77	NS	**		0.58	0.77	NS	**
GW-496 x HD-2864	9.39613		11.1167	10.6567		-1.72054	-1.26054	-1.72054		-15.4771	-11.8287	-15.4771	0.58	0.77	NS	**		10.8	10.7		-1.40387	-1.30387		-12.9988	-12.1857		0.58	0.77	NS	**		0.58	0.77	NS	**
GW-496 x USA-385	10.6767		11.1167	9.36049		-0.44	1.31618	-0.44		-3.95802	14.061	-3.95802	0.58	0.77	NS	NS		10.8	10.7		-0.123333	-0.0233333		-1.14198	-0.218069		0.58	0.77	NS	NS		0.58	0.77	NS	NS
LOK-1 x GW-322	10.164		11.5067	11.5333		-1.34266	-1.36932	-1.36932		-11.6685	-11.8727	-11.8727	0.58	0.77	NS	**		10.8	10.7		-0.635988	-0.535988		-5.88878	-5.00924		0.58	0.77	NS	*		0.58	0.77	NS	NS
LOK-1 x GW-366	10.3033		11.5067	10.92		-1.20333	-0.616667	-1.20333		-10.4577	-5.64713	-10.4577	0.58	0.77	NS	**		10.8	10.7		-0.496667	-0.396667		-4.59877	-3.70717		0.58	0.77	NS	NS		0.58	0.77	NS	NS
LOK-1 x HI-1544	10.6967		11.5067	13.8733		-0.81	-3.17667	-3.17667		-7.0394	-22.8976	-22.8976	0.58	0.77	NS	**		10.8	10.7		-0.103333	-0.00333333		-0.95679	-0.0311526		0.58	0.77	NS	NS		0.58	0.77	NS	NS
LOK-1 x GW-173	10.42		11.5067	12.93		-1.08667	-2.51	-2.51		-9.4438	-19.4122	-19.4122	0.58	0.77	NS	**		10.8	10.7		-0.38	-0.28		-3.51852	-2.61682		0.58	0.77	NS	NS		0.58	0.77	NS	NS
LOK-1 x GW-11	10.2858		11.5067	11.8133		-1.22085	-1.52752	-1.52752		-10.6099	-12.9304	-12.9304	0.58	0.77	NS	**		10.8	10.7		-0.514183	-0.414183		-4.76095	-3.87087		0.58	0.77	NS	NS		0.58	0.77	NS	NS
LOK-1 x HD-2864	10.97		11.5067	10.6567		-0.536667	0.313333	-0.536667		-4.66396	2.94026	-4.66396	0.58	0.77	NS	NS		10.8	10.7		0.17	0.27		1.57407	2.52336		0.58	0.77	NS	NS		0.58	0.77	NS	NS
LOK-1 x USA-385	9.98897		11.5067	9.36049		-1.5177	0.628484	-1.5177		-13.1897	6.71422	-13.1897	0.58	0.77	NS	**		10.8	10.7		-0.811029	-0.711029		-7.50953	-6.64513		0.58	0.77	NS	NS		0.58	0.77	NS	NS
GW-322 x GW-366	10.2538		11.5333	10.92		-1.27958	-0.666243	-1.27958		-11.0946	-6.10113	-11.0946	0.58	0.77	NS	**		10.8	10.7		-0.546243	-0.446243		-5.05781	-4.1705		0.58	0.77	NS	NS		0.58	0.77	NS	NS
GW-322 x HI-1544	12.2667		11.5333	13.8733		0.733333	-1.60667	-1.60667		6.35838	-11.581	-11.581	0.58	0.77	NS	**		10.8	10.7		1.46667	1.56667		13.5802	14.6417		0.58	0.77	**	**		0.58	0.77	**	**
GW-322 x GW-173	10.1781		11.5333	12.93		-1.35522	-2.75189	-2.75189		-11.7505	-21.283	-21.283	0.58	0.77	NS	**		10.8	10.7		-0.621886	-0.521886		-5.75821	-4.87744		0.58	0.77	NS	*		0.58	0.77	NS	NS
GW-322 x GW-11	10.0067		11.5333	11.8133		-1.52667	-1.80667	-1.80667		-13.237	-15.2935	-15.2935	0.58	0.77	NS	**		10.8	10.7		-0.793333	-0.693333		-7.34568	-6.47975		0.58	0.77	NS	**		0.58	0.77	NS	*
GW-322 x HD-2864	10.53		11.5333	10.6567		-1.00333	-0.126667	-1.00333		-8.69942	-1.18861	-8.69942	0.58	0.77	NS	**		10.8	10.7		-0.27	-0.17		-2.5	-1.58879		0.58	0.77	NS	NS		0.58	0.77	NS	NS
GW-322 x USA-385	10.5733		11.5333	9.36049		-0.96	1.21285	-0.96		-8.3237	12.9571	-8.3237	0.58	0.77	NS	**		10.8	10.7		-0.226667	-0.126667		-2.09877	-1.1838		0.58	0.77	NS	NS		0.58	0.77	NS	NS
GW-366 x HI-1544	10.5		10.92	13.8733		-0.42	-3.37333	-3.37333		-3.84615	-24.3152	-24.3152	0.58	0.77	NS	**		10.8	10.7		-0.3	-0.2		-2.77778	-1.86916		0.58	0.77	NS	NS		0.58	0.77	NS	NS
GW-366 x GW-173	11.2467		10.92	12.93		0.326667	-1.68333	-1.68333		2.99145	-13.0188	-13.0188	0.58	0.77	NS	**		10.8	10.7		0.446667	0.546667		4.1358	5.10903		0.58	0.77	NS	NS		0.58	0.77	NS	NS
GW-366 x GW-11	12.15		10.92	11.8133		1.23	0.336667	0.336667		11.2637	2.84989	2.84989	0.58	0.77	NS	NS		10.8	10.7		1.35	1.45		12.5	13.5514		0.58	0.77	**	**		0.58	0.77	**	**
GW-366 x HD-2864	10.1867		10.92	10.6567		-0.733333	-0.47	-0.733333		-6.71551	-4.41038	-6.71551	0.58	0.77	NS	*		10.8	10.7		-0.613333	-0.513333		-5.67901	-4.79751		0.58	0.77	NS	*		0.58	0.77	NS	NS
GW-366 x USA-385	9.89569		10.92	9.36049		-1.02431	0.535203	-1.02431		-9.38013	5.71768	-9.38013	0.58	0.77	NS	**		10.8	10.7		-0.90431	-0.80431		-8.37324	-7.51691		0.58	0.77	NS	**		0.58	0.77	NS	**
HI-1544 x GW-173	15.3533		13.8733	12.93		1.48	2.42333	1.48		10.6679	18.7419	10.6679	0.58	0.77	**	**		10.8	10.7		4.55333	4.65333		42.1605	43.4891		0.58	0.77	**	**		0.58	0.77	**	**
HI-1544 x GW-11	8.77667		13.8733	11.8133		-5.09667	-3.03667	-5.09667		-36.7371	-25.7054	-36.7371	0.58	0.77	NS	**		10.8	10.7		-2.02333	-1.92333		-18.7346	-17.9751		0.58	0.77	NS	**		0.58	0.77	NS	**
HI-1544 x HD-2864	11.1867		13.8733	10.6567		-2.68667	0.53	-2.68667		-19.3657	4.97341	-19.3657	0.58	0.77	NS	**		10.8	10.7		0.386667	0.486667		3.58025	4.54829		0.58	0.77	NS	NS		0.58	0.77	NS	NS
HI-1544 x USA-385	11.1467		13.8733	9.36049		-2.72667	1.78618	-2.72667		-19.654	19.0821	-19.654	0.58	0.77	NS	**		10.8	10.7		0.346667	0.446667		3.20988	4.17445		0.58	0.77	NS	NS		0.58	0.77	NS	NS
GW-173 x GW-11	11.7533		12.93	11.8133		-1.17667	-0.06	-1.17667		-9.10028	-0.507901	-9.10028	0.58	0.77	NS	**		10.8	10.7		0.953333	1.05333		8.82716	9.84424		0.58	0.77	**	**		0.58	0.77	**	**
GW-173 x HD-2864	12.14		12.93	10.6567		-0.79	1.48333	-0.79		-6.10982	13.9193	-6.10982	0.58	0.77	NS	**		10.8	10.7		1.34	1.44		12.4074	13.4579		0.58	0.77	**	**		0.58	0.77	**	**
GW-173 x USA-385	12.3767		12.93	9.36049		-0.553333	3.01618	-0.553333		-4.27945	32.2225	-4.27945	0.58	0.77	NS	NS		10.8	10.7		1.57667	1.67667		14.5988	15.6698		0.58	0.77	**	**		0.58	0.77	**	**
GW-11 x HD-2864	11.71		11.8133	10.6567		-0.103333	1.05333	-0.103333		-0.874718	9.88427	-0.874718	0.58	0.77	NS	NS		10.8	10.7		0.91	1.01		8.42593	9.43925		0.58	0.77	**	**		0.58	0.77	**	**
GW-11 x USA-385	10.5767		11.8133	9.36049		-1.23667	1.21618	-1.23667		-10.4684	12.9927	-10.4684	0.58	0.77	NS	**		10.8	10.7		-0.223333	-0.123333		-2.0679	-1.15265		0.58	0.77	NS	NS		0.58	0.77	NS	NS
HD-2864 x USA-385	11.7867		10.6567	9.36049		1.13	2.42618	1.13		10.6037	25.9194	10.6037	0.58	0.77	**	**		10.8	10.7		0.986667	1.08667		9.1358	10.1558		0.58	0.77	**	**		0.58	0.77	**	**
											max	10.6679											max	42.1605	43.4891
											min	-36.7371											min	-18.7346	-17.9751
GW - 451 (P1)	11.45
GW - 496 (P2)	11.1167
LOK-1 (P3)	11.5067
GW-322 (P4)	11.5333
GW-366 (P5)	10.92
HI-1544 (P6)	13.8733
GW-173 (P7)	12.93
GW-11 (P8)	11.8133
HD-2864 (P9)	10.6567
USA-385 (P10)	9.36049

## Sheet: E2
			HETEROBELTIOSIS															STANDARD HETEROSIS									SH1					SH2
	F 1		BP1	BP2		BP1 d	BP2 d	Final		BP1 %	BP2 %	Final	0.01	0.05	sign	final		CH1	CH2		SH1d	SH2 d		SH 1 %	SH 2 %		0.01	0.05	sign	final		0.01	0.05	sign	final
GW 451 x GW-496	10.44		14.8633	14.03		-4.42333	-3.59	-4.42333		-29.76	-25.588	-29.76	0.62	0.82	NS	**		14.7	13.7		-4.26	-3.26		-28.9796	-23.7956		0.62	0.82	NS	**		0.62	0.82	NS	**
GW 451 x LOK-1	10.4633		14.8633	12.6767		-4.4	-2.21333	-4.4		-29.6031	-17.4599	-29.6031	0.62	0.82	NS	**		14.7	13.7		-4.23667	-3.23667		-28.8209	-23.6253		0.62	0.82	NS	**		0.62	0.82	NS	**
GW 451 x GW-322	11.13		14.8633	12.89		-3.73333	-1.76	-3.73333		-25.1177	-13.654	-25.1177	0.62	0.82	NS	**		14.7	13.7		-3.57	-2.57		-24.2857	-18.7591		0.62	0.82	NS	**		0.62	0.82	NS	**
GW 451 x GW-366	10.9767		14.8633	13.4033		-3.88667	-2.42667	-3.88667		-26.1494	-18.1049	-26.1494	0.62	0.82	NS	**		14.7	13.7		-3.72333	-2.72333		-25.3288	-19.8783		0.62	0.82	NS	**		0.62	0.82	NS	**
GW 451 x HI-1544	10.8967		14.8633	12.4533		-3.96667	-1.55667	-3.96667		-26.6876	-12.5	-26.6876	0.62	0.82	NS	**		14.7	13.7		-3.80333	-2.80333		-25.873	-20.4623		0.62	0.82	NS	**		0.62	0.82	NS	**
GW 451 x GW-173	11.5		14.8633	13.68		-3.36333	-2.18	-3.36333		-22.6284	-15.9357	-22.6284	0.62	0.82	NS	**		14.7	13.7		-3.2	-2.2		-21.7687	-16.0584		0.62	0.82	NS	**		0.62	0.82	NS	**
GW 451 x GW-11	10.7		14.8633	13.68		-4.16333	-2.98	-4.16333		-28.0108	-21.7836	-28.0108	0.62	0.82	NS	**		14.7	13.7		-4	-3		-27.2109	-21.8978		0.62	0.82	NS	**		0.62	0.82	NS	**
GW 451 x HD-2864	11.1633		14.8633	13.5567		-3.7	-2.39333	-3.7		-24.8935	-17.6543	-24.8935	0.62	0.82	NS	**		14.7	13.7		-3.53667	-2.53667		-24.059	-18.5158		0.62	0.82	NS	**		0.62	0.82	NS	**
GW 451 x USA-385	11.9967		14.8633	13.7033		-2.86667	-1.70667	-2.86667		-19.2868	-12.4544	-19.2868	0.62	0.82	NS	**		14.7	13.7		-2.70333	-1.70333		-18.39	-12.4331		0.62	0.82	NS	**		0.62	0.82	NS	**
GW-496 x LOK-1	11.84		14.03	12.6767		-2.19	-0.836667	-2.19		-15.6094	-6.60005	-15.6094	0.62	0.82	NS	**		14.7	13.7		-2.86	-1.86		-19.4558	-13.5766		0.62	0.82	NS	**		0.62	0.82	NS	**
GW-496 x GW-322	12.1		14.03	12.89		-1.93	-0.79	-1.93		-13.7562	-6.12878	-13.7562	0.62	0.82	NS	**		14.7	13.7		-2.6	-1.6		-17.6871	-11.6788		0.62	0.82	NS	**		0.62	0.82	NS	**
GW-496 x GW-366	11.97		14.03	13.4033		-2.06	-1.43333	-2.06		-14.6828	-10.6939	-14.6828	0.62	0.82	NS	**		14.7	13.7		-2.73	-1.73		-18.5714	-12.6277		0.62	0.82	NS	**		0.62	0.82	NS	**
GW-496 x HI-1544	10.4167		14.03	12.4533		-3.61333	-2.03667	-3.61333		-25.7543	-16.3544	-25.7543	0.62	0.82	NS	**		14.7	13.7		-4.28333	-3.28333		-29.1383	-23.9659		0.62	0.82	NS	**		0.62	0.82	NS	**
GW-496 x GW-173	10.8133		14.03	13.68		-3.21667	-2.86667	-3.21667		-22.9271	-20.9552	-22.9271	0.62	0.82	NS	**		14.7	13.7		-3.88667	-2.88667		-26.4399	-21.0706		0.62	0.82	NS	**		0.62	0.82	NS	**
GW-496 x GW-11	9.57667		14.03	13.68		-4.45333	-4.10333	-4.45333		-31.7415	-29.9951	-31.7415	0.62	0.82	NS	**		14.7	13.7		-5.12333	-4.12333		-34.8526	-30.0973		0.62	0.82	NS	**		0.62	0.82	NS	**
GW-496 x HD-2864	10.2933		14.03	13.5567		-3.73667	-3.26333	-3.73667		-26.6334	-24.0718	-26.6334	0.62	0.82	NS	**		14.7	13.7		-4.40667	-3.40667		-29.9773	-24.8662		0.62	0.82	NS	**		0.62	0.82	NS	**
GW-496 x USA-385	10.86		14.03	13.7033		-3.17	-2.84333	-3.17		-22.5944	-20.7492	-22.5944	0.62	0.82	NS	**		14.7	13.7		-3.84	-2.84		-26.1224	-20.7299		0.62	0.82	NS	**		0.62	0.82	NS	**
LOK-1 x GW-322	9.47333		12.6767	12.89		-3.20333	-3.41667	-3.41667		-25.2695	-26.5063	-26.5063	0.62	0.82	NS	**		14.7	13.7		-5.22667	-4.22667		-35.5556	-30.8516		0.62	0.82	NS	**		0.62	0.82	NS	**
LOK-1 x GW-366	10.02		12.6767	13.4033		-2.65667	-3.38333	-3.38333		-20.9571	-25.2425	-25.2425	0.62	0.82	NS	**		14.7	13.7		-4.68	-3.68		-31.8367	-26.8613		0.62	0.82	NS	**		0.62	0.82	NS	**
LOK-1 x HI-1544	9.41667		12.6767	12.4533		-3.26	-3.03667	-3.26		-25.7165	-24.3844	-25.7165	0.62	0.82	NS	**		14.7	13.7		-5.28333	-4.28333		-35.941	-31.2652		0.62	0.82	NS	**		0.62	0.82	NS	**
LOK-1 x GW-173	12.32		12.6767	13.68		-0.356667	-1.36	-1.36		-2.81357	-9.94152	-9.94152	0.62	0.82	NS	**		14.7	13.7		-2.38	-1.38		-16.1905	-10.073		0.62	0.82	NS	**		0.62	0.82	NS	**
LOK-1 x GW-11	11.5533		12.6767	13.68		-1.12333	-2.12667	-2.12667		-8.86143	-15.5458	-15.5458	0.62	0.82	NS	**		14.7	13.7		-3.14667	-2.14667		-21.4059	-15.6691		0.62	0.82	NS	**		0.62	0.82	NS	**
LOK-1 x HD-2864	11.0767		12.6767	13.5567		-1.6	-2.48	-2.48		-12.6216	-18.2936	-18.2936	0.62	0.82	NS	**		14.7	13.7		-3.62333	-2.62333		-24.6485	-19.1484		0.62	0.82	NS	**		0.62	0.82	NS	**
LOK-1 x USA-385	12.3467		12.6767	13.7033		-0.33	-1.35667	-1.35667		-2.60321	-9.90027	-9.90027	0.62	0.82	NS	**		14.7	13.7		-2.35333	-1.35333		-16.0091	-9.87835		0.62	0.82	NS	**		0.62	0.82	NS	**
GW-322 x GW-366	11.62		12.89	13.4033		-1.27	-1.78333	-1.78333		-9.8526	-13.3051	-13.3051	0.62	0.82	NS	**		14.7	13.7		-3.08	-2.08		-20.9524	-15.1825		0.62	0.82	NS	**		0.62	0.82	NS	**
GW-322 x HI-1544	12.38		12.89	12.4533		-0.51	-0.0733333	-0.51		-3.95656	-0.588865	-3.95656	0.62	0.82	NS	NS		14.7	13.7		-2.32	-1.32		-15.7823	-9.63504		0.62	0.82	NS	**		0.62	0.82	NS	**
GW-322 x GW-173	13.6333		12.89	13.68		0.743333	-0.0466667	-0.0466667		5.76674	-0.341131	-0.341131	0.62	0.82	NS	NS		14.7	13.7		-1.06667	-0.0666667		-7.25624	-0.486618		0.62	0.82	NS	**		0.62	0.82	NS	NS
GW-322 x GW-11	10.2467		12.89	13.68		-2.64333	-3.43333	-3.43333		-20.5069	-25.0975	-25.0975	0.62	0.82	NS	**		14.7	13.7		-4.45333	-3.45333		-30.2948	-25.2068		0.62	0.82	NS	**		0.62	0.82	NS	**
GW-322 x HD-2864	11.87		12.89	13.5567		-1.02	-1.68667	-1.68667		-7.91311	-12.4416	-12.4416	0.62	0.82	NS	**		14.7	13.7		-2.83	-1.83		-19.2517	-13.3577		0.62	0.82	NS	**		0.62	0.82	NS	**
GW-322 x USA-385	11.56		12.89	13.7033		-1.33	-2.14333	-2.14333		-10.3181	-15.641	-15.641	0.62	0.82	NS	**		14.7	13.7		-3.14	-2.14		-21.3605	-15.6204		0.62	0.82	NS	**		0.62	0.82	NS	**
GW-366 x HI-1544	13.0233		13.4033	12.4533		-0.38	0.57	-0.38		-2.83512	4.57709	-2.83512	0.62	0.82	NS	NS		14.7	13.7		-1.67667	-0.676667		-11.4059	-4.93917		0.62	0.82	NS	**		0.62	0.82	NS	*
GW-366 x GW-173	12.88		13.4033	13.68		-0.523333	-0.8	-0.8		-3.9045	-5.84795	-5.84795	0.62	0.82	NS	*		14.7	13.7		-1.82	-0.82		-12.381	-5.9854		0.62	0.82	NS	**		0.62	0.82	NS	**
GW-366 x GW-11	11.3567		13.4033	13.68		-2.04667	-2.32333	-2.32333		-15.2698	-16.9834	-16.9834	0.62	0.82	NS	**		14.7	13.7		-3.34333	-2.34333		-22.7438	-17.1046		0.62	0.82	NS	**		0.62	0.82	NS	**
GW-366 x HD-2864	12.5167		13.4033	13.5567		-0.886667	-1.04	-1.04		-6.61527	-7.6715	-7.6715	0.62	0.82	NS	**		14.7	13.7		-2.18333	-1.18333		-14.8526	-8.63747		0.62	0.82	NS	**		0.62	0.82	NS	**
GW-366 x USA-385	12.0867		13.4033	13.7033		-1.31667	-1.61667	-1.61667		-9.82343	-11.7976	-11.7976	0.62	0.82	NS	**		14.7	13.7		-2.61333	-1.61333		-17.7778	-11.7762		0.62	0.82	NS	**		0.62	0.82	NS	**
HI-1544 x GW-173	10.87		12.4533	13.68		-1.58333	-2.81	-2.81		-12.7141	-20.5409	-20.5409	0.62	0.82	NS	**		14.7	13.7		-3.83	-2.83		-26.0544	-20.6569		0.62	0.82	NS	**		0.62	0.82	NS	**
HI-1544 x GW-11	9.68333		12.4533	13.68		-2.77	-3.99667	-3.99667		-22.243	-29.2154	-29.2154	0.62	0.82	NS	**		14.7	13.7		-5.01667	-4.01667		-34.127	-29.3187		0.62	0.82	NS	**		0.62	0.82	NS	**
HI-1544 x HD-2864	10.6567		12.4533	13.5567		-1.79667	-2.9	-2.9		-14.4272	-21.3917	-21.3917	0.62	0.82	NS	**		14.7	13.7		-4.04333	-3.04333		-27.5057	-22.2141		0.62	0.82	NS	**		0.62	0.82	NS	**
HI-1544 x USA-385	10.8767		12.4533	13.7033		-1.57667	-2.82667	-2.82667		-12.6606	-20.6276	-20.6276	0.62	0.82	NS	**		14.7	13.7		-3.82333	-2.82333		-26.0091	-20.6083		0.62	0.82	NS	**		0.62	0.82	NS	**
GW-173 x GW-11	12.0733		13.68	13.68		-1.60667	-1.60667	-1.60667		-11.7446	-11.7446	-11.7446	0.62	0.82	NS	**		14.7	13.7		-2.62667	-1.62667		-17.8685	-11.8735		0.62	0.82	NS	**		0.62	0.82	NS	**
GW-173 x HD-2864	13.4233		13.68	13.5567		-0.256667	-0.133333	-0.256667		-1.87622	-0.983526	-1.87622	0.62	0.82	NS	NS		14.7	13.7		-1.27667	-0.276667		-8.68481	-2.01946		0.62	0.82	NS	**		0.62	0.82	NS	NS
GW-173 x USA-385	14.2633		13.68	13.7033		0.583333	0.56	0.56		4.26413	4.0866	4.0866	0.62	0.82	NS	NS		14.7	13.7		-0.436667	0.563333		-2.97052	4.11192		0.62	0.82	NS	NS		0.62	0.82	NS	NS
GW-11 x HD-2864	12.4167		13.68	13.5567		-1.26333	-1.14	-1.26333		-9.23489	-8.40915	-9.23489	0.62	0.82	NS	**		14.7	13.7		-2.28333	-1.28333		-15.5329	-9.3674		0.62	0.82	NS	**		0.62	0.82	NS	**
GW-11 x USA-385	12.27		13.68	13.7033		-1.41	-1.43333	-1.43333		-10.307	-10.4597	-10.4597	0.62	0.82	NS	**		14.7	13.7		-2.43	-1.43		-16.5306	-10.438		0.62	0.82	NS	**		0.62	0.82	NS	**
HD-2864 x USA-385	14.6133		13.5567	13.7033		1.05667	0.91	0.91		7.79444	6.64072	6.64072	0.62	0.82	**	**		14.7	13.7		-0.0866667	0.913333		-0.589569	6.66667		0.62	0.82	NS	NS		0.62	0.82	**	**
											max	6.64072											max	-0.589569	6.66667
											min	-31.7415											min	-35.941	-31.2652
GW - 451 (P1)	14.8633
GW - 496 (P2)	14.03
LOK-1 (P3)	12.6767
GW-322 (P4)	12.89
GW-366 (P5)	13.4033
HI-1544 (P6)	12.4533
GW-173 (P7)	13.3
GW-11 (P8)	13.68
HD-2864 (P9)	13.5567
USA-385 (P10)	13.7033
