# Supplementary material for: Combining ability, heterosis and performance of grain yield and content of Fe, Zn and protein in bread wheat under normal and late sowing conditions
Source: PeerJ. 2023 Mar 9;11:e14971. doi: 10.7717/peerj.14971 (PMC10008312; doi:10.7717/peerj.14971)
Supplement: Supplemental Information 7 — Grain yield per plant (GYP). [file peerj-11-14971-s007.xlsx]

## Sheet: E1 
			HETEROBELTIOSIS															STANDARD HETEROSIS									SH1					SH2
	F 1		BP1	BP2		BP1 d	BP2 d	Final		BP1 %	BP2 %	Final	0.01	0.05	sign	final		CH1	CH2		SH1d	SH2 d		SH 1 %	SH 2 %		0.01	0.05	sign	final		0.01	0.05	sign	final
GW 451 x GW-496	19.9543		15.0207	14.2213		4.93367	5.733	4.93367		32.8459	40.3127	32.8459	2.8	3.68	**	**		16.5	18		3.45433	1.95433		20.9354	10.8574		2.8	3.68	*	*		2.8	3.68	NS	NS
GW 451 x LOK-1	29.8433		15.0207	21.712		14.8227	8.13133	8.13133		98.6818	37.4509	37.4509	2.8	3.68	**	**		16.5	18		13.3433	11.8433		80.8687	65.7963		2.8	3.68	**	**		2.8	3.68	**	**
GW 451 x GW-322	32.9021		15.0207	17.213		17.8814	15.6891	15.6891		119.045	91.1465	91.1465	2.8	3.68	**	**		16.5	18		16.4021	14.9021		99.4064	82.7892		2.8	3.68	**	**		2.8	3.68	**	**
GW 451 x GW-366	15.8077		15.0207	17.2933		0.787	-1.48567	-1.48567		5.23945	-8.59098	-8.59098	2.8	3.68	NS	NS		16.5	18		-0.692333	-2.19233		-4.19596	-12.1796		2.8	3.68	NS	NS		2.8	3.68	NS	NS
GW 451 x HI-1544	20.442		15.0207	23.1013		5.42133	-2.65933	-2.65933		36.0925	-11.5116	-11.5116	2.8	3.68	NS	NS		16.5	18		3.942	2.442		23.8909	13.5667		2.8	3.68	**	**		2.8	3.68	NS	NS
GW 451 x GW-173	22.9357		15.0207	14.475		7.915	8.46067	7.915		52.6941	58.4502	52.6941	2.8	3.68	**	**		16.5	18		6.43567	4.93567		39.004	27.4204		2.8	3.68	**	**		2.8	3.68	**	**
GW 451 x GW-11	17.1713		15.0207	16.644		2.15067	0.527333	0.527333		14.3181	3.16831	3.16831	2.8	3.68	NS	NS		16.5	18		0.671333	-0.828667		4.06869	-4.6037		2.8	3.68	NS	NS		2.8	3.68	NS	NS
GW 451 x HD-2864	16.424		15.0207	16.5357		1.40333	-0.111667	-0.111667		9.34268	-0.675308	-0.675308	2.8	3.68	NS	NS		16.5	18		-0.076	-1.576		-0.460606	-8.75556		2.8	3.68	NS	NS		2.8	3.68	NS	NS
GW 451 x USA-385	15.2567		15.0207	15.5507		0.236	-0.294	-0.294		1.57117	-1.89059	-1.89059	2.8	3.68	NS	NS		16.5	18		-1.24333	-2.74333		-7.53535	-15.2407		2.8	3.68	NS	NS		2.8	3.68	NS	NS
GW-496 x LOK-1	13.621		14.2213	21.712		-0.600333	-8.091	-8.091		-4.22136	-37.2651	-37.2651	2.8	3.68	NS	**		16.5	18		-2.879	-4.379		-17.4485	-24.3278		2.8	3.68	NS	*		2.8	3.68	NS	**
GW-496 x GW-322	12.4803		14.2213	17.213		-1.741	-4.73267	-4.73267		-12.2422	-27.4947	-27.4947	2.8	3.68	NS	**		16.5	18		-4.01967	-5.51967		-24.3616	-30.6648		2.8	3.68	NS	**		2.8	3.68	NS	**
GW-496 x GW-366	16.6023		14.2213	17.2933		2.381	-0.691	-0.691		16.7425	-3.99576	-3.99576	2.8	3.68	NS	NS		16.5	18		0.102333	-1.39767		0.620202	-7.76481		2.8	3.68	NS	NS		2.8	3.68	NS	NS
GW-496 x HI-1544	13.1697		14.2213	23.1013		-1.05167	-9.93167	-9.93167		-7.39499	-42.9917	-42.9917	2.8	3.68	NS	**		16.5	18		-3.33033	-4.83033		-20.1838	-26.8352		2.8	3.68	NS	*		2.8	3.68	NS	**
GW-496 x GW-173	12.89		14.2213	14.475		-1.33133	-1.585	-1.585		-9.36152	-10.9499	-10.9499	2.8	3.68	NS	NS		16.5	18		-3.61	-5.11		-21.8788	-28.3889		2.8	3.68	NS	*		2.8	3.68	NS	**
GW-496 x GW-11	19.086		14.2213	16.644		4.86467	2.442	2.442		34.2068	14.672	14.672	2.8	3.68	NS	NS		16.5	18		2.586	1.086		15.6727	6.03333		2.8	3.68	NS	NS		2.8	3.68	NS	NS
GW-496 x HD-2864	17.31		14.2213	16.5357		3.08867	0.774333	0.774333		21.7185	4.68281	4.68281	2.8	3.68	NS	NS		16.5	18		0.81	-0.69		4.90909	-3.83333		2.8	3.68	NS	NS		2.8	3.68	NS	NS
GW-496 x USA-385	16.41		14.2213	15.5507		2.18867	0.859333	0.859333		15.39	5.52602	5.52602	2.8	3.68	NS	NS		16.5	18		-0.09	-1.59		-0.545455	-8.83333		2.8	3.68	NS	NS		2.8	3.68	NS	NS
LOK-1 x GW-322	21.7713		21.712	17.213		0.0593333	4.55833	0.0593333		0.273274	26.4819	0.273274	2.8	3.68	NS	NS		16.5	18		5.27133	3.77133		31.9475	20.9519		2.8	3.68	**	**		2.8	3.68	**	**
LOK-1 x GW-366	21.3403		21.712	17.2933		-0.371667	4.047	-0.371667		-1.7118	23.4021	-1.7118	2.8	3.68	NS	NS		16.5	18		4.84033	3.34033		29.3354	18.5574		2.8	3.68	**	**		2.8	3.68	*	*
LOK-1 x HI-1544	22.1383		21.712	23.1013		0.426333	-0.963	-0.963		1.96358	-4.16859	-4.16859	2.8	3.68	NS	NS		16.5	18		5.63833	4.13833		34.1717	22.9907		2.8	3.68	**	**		2.8	3.68	**	**
LOK-1 x GW-173	16.72		21.712	14.475		-4.992	2.245	-4.992		-22.9919	15.5095	-22.9919	2.8	3.68	NS	**		16.5	18		0.22	-1.28		1.33333	-7.11111		2.8	3.68	NS	NS		2.8	3.68	NS	NS
LOK-1 x GW-11	13.3313		21.712	16.644		-8.38067	-3.31267	-8.38067		-38.5992	-19.9031	-38.5992	2.8	3.68	NS	**		16.5	18		-3.16867	-4.66867		-19.204	-25.937		2.8	3.68	NS	*		2.8	3.68	NS	**
LOK-1 x HD-2864	12.3997		21.712	16.5357		-9.31233	-4.136	-9.31233		-42.8903	-25.0126	-42.8903	2.8	3.68	NS	**		16.5	18		-4.10033	-5.60033		-24.8505	-31.113		2.8	3.68	NS	**		2.8	3.68	NS	**
LOK-1 x USA-385	14.625		21.712	15.5507		-7.087	-0.925667	-7.087		-32.6409	-5.95259	-32.6409	2.8	3.68	NS	**		16.5	18		-1.875	-3.375		-11.3636	-18.75		2.8	3.68	NS	NS		2.8	3.68	NS	*
GW-322 x GW-366	18.017		17.213	17.2933		0.804	0.723667	0.723667		4.67089	4.18466	4.18466	2.8	3.68	NS	NS		16.5	18		1.517	0.017		9.19394	0.0944444		2.8	3.68	NS	NS		2.8	3.68	NS	NS
GW-322 x HI-1544	25.408		17.213	23.1013		8.195	2.30667	2.30667		47.6094	9.98499	9.98499	2.8	3.68	NS	NS		16.5	18		8.908	7.408		53.9879	41.1556		2.8	3.68	**	**		2.8	3.68	**	**
GW-322 x GW-173	18.6503		17.213	14.475		1.43733	4.17533	1.43733		8.35028	28.8451	8.35028	2.8	3.68	NS	NS		16.5	18		2.15033	0.650333		13.0323	3.61296		2.8	3.68	NS	NS		2.8	3.68	NS	NS
GW-322 x GW-11	19.92		17.213	16.644		2.707	3.276	2.707		15.7265	19.6828	15.7265	2.8	3.68	NS	NS		16.5	18		3.42	1.92		20.7273	10.6667		2.8	3.68	*	*		2.8	3.68	NS	NS
GW-322 x HD-2864	14.528		17.213	16.5357		-2.685	-2.00767	-2.685		-15.5987	-12.1414	-15.5987	2.8	3.68	NS	NS		16.5	18		-1.972	-3.472		-11.9515	-19.2889		2.8	3.68	NS	NS		2.8	3.68	NS	*
GW-322 x USA-385	14.5437		17.213	15.5507		-2.66933	-1.007	-2.66933		-15.5077	-6.47561	-15.5077	2.8	3.68	NS	NS		16.5	18		-1.95633	-3.45633		-11.8566	-19.2019		2.8	3.68	NS	NS		2.8	3.68	NS	*
GW-366 x HI-1544	16.6177		17.2933	23.1013		-0.675667	-6.48367	-6.48367		-3.90709	-28.0662	-28.0662	2.8	3.68	NS	**		16.5	18		0.117667	-1.38233		0.713131	-7.67963		2.8	3.68	NS	NS		2.8	3.68	NS	NS
GW-366 x GW-173	10.6573		17.2933	14.475		-6.63608	-3.81775	-6.63608		-38.3736	-26.3748	-38.3736	2.8	3.68	NS	**		16.5	18		-5.84275	-7.34275		-35.4106	-40.793		2.8	3.68	NS	**		2.8	3.68	NS	**
GW-366 x GW-11	13.9381		17.2933	16.644		-3.35519	-2.70586	-3.35519		-19.4017	-16.2573	-19.4017	2.8	3.68	NS	*		16.5	18		-2.56186	-4.06186		-15.5264	-22.5659		2.8	3.68	NS	NS		2.8	3.68	NS	**
GW-366 x HD-2864	17.1393		17.2933	16.5357		-0.154	0.603667	-0.154		-0.890517	3.65069	-0.890517	2.8	3.68	NS	NS		16.5	18		0.639333	-0.860667		3.87475	-4.78148		2.8	3.68	NS	NS		2.8	3.68	NS	NS
GW-366 x USA-385	14.2433		17.2933	15.5507		-3.05	-1.30733	-3.05		-17.6369	-8.40693	-17.6369	2.8	3.68	NS	*		16.5	18		-2.25667	-3.75667		-13.6768	-20.8704		2.8	3.68	NS	NS		2.8	3.68	NS	**
HI-1544 x GW-173	11.6388		23.1013	14.475		-11.4625	-2.83616	-11.4625		-49.6183	-19.5935	-49.6183	2.8	3.68	NS	**		16.5	18		-4.86116	-6.36116		-29.4616	-35.3398		2.8	3.68	NS	**		2.8	3.68	NS	**
HI-1544 x GW-11	12.4363		23.1013	16.644		-10.665	-4.20767	-10.665		-46.1662	-25.2804	-46.1662	2.8	3.68	NS	**		16.5	18		-4.06367	-5.56367		-24.6283	-30.9093		2.8	3.68	NS	**		2.8	3.68	NS	**
HI-1544 x HD-2864	15.837		23.1013	16.5357		-7.26433	-0.698667	-7.26433		-31.4455	-4.22521	-31.4455	2.8	3.68	NS	**		16.5	18		-0.663	-2.163		-4.01818	-12.0167		2.8	3.68	NS	NS		2.8	3.68	NS	NS
HI-1544 x USA-385	15.6587		23.1013	15.5507		-7.44267	0.108	-7.44267		-32.2175	0.694504	-32.2175	2.8	3.68	NS	**		16.5	18		-0.841333	-2.34133		-5.09899	-13.0074		2.8	3.68	NS	NS		2.8	3.68	NS	NS
GW-173 x GW-11	12.7413		14.475	16.644		-1.73367	-3.90267	-3.90267		-11.977	-23.4479	-23.4479	2.8	3.68	NS	**		16.5	18		-3.75867	-5.25867		-22.7798	-29.2148		2.8	3.68	NS	**		2.8	3.68	NS	**
GW-173 x HD-2864	11.983		14.475	16.5357		-2.492	-4.55267	-4.55267		-17.2159	-27.5324	-27.5324	2.8	3.68	NS	**		16.5	18		-4.517	-6.017		-27.3758	-33.4278		2.8	3.68	NS	**		2.8	3.68	NS	**
GW-173 x USA-385	11.131		14.475	15.5507		-3.344	-4.41967	-4.41967		-23.1019	-28.4211	-28.4211	2.8	3.68	NS	**		16.5	18		-5.369	-6.869		-32.5394	-38.1611		2.8	3.68	NS	**		2.8	3.68	NS	**
GW-11 x HD-2864	14.896		16.644	16.5357		-1.748	-1.63967	-1.748		-10.5023	-9.91594	-10.5023	2.8	3.68	NS	NS		16.5	18		-1.604	-3.104		-9.72121	-17.2444		2.8	3.68	NS	NS		2.8	3.68	NS	*
GW-11 x USA-385	13.7303		16.644	15.5507		-2.91367	-1.82033	-2.91367		-17.5058	-11.7058	-17.5058	2.8	3.68	NS	*		16.5	18		-2.76967	-4.26967		-16.7859	-23.7204		2.8	3.68	NS	NS		2.8	3.68	NS	**
HD-2864 x USA-385	9.976		16.5357	15.5507		-6.55967	-5.57467	-6.55967		-39.6698	-35.8484	-39.6698	2.8	3.68	NS	**		16.5	18		-6.524	-8.024		-39.5394	-44.5778		2.8	3.68	NS	**		2.8	3.68	NS	**
											max	91.1465											max	99.4064	82.7892
											min	-49.6183											min	-39.5394	-44.5778
GW - 451 (P1)	15.0207
GW - 496 (P2)	14.2213
LOK-1 (P3)	21.712
GW-322 (P4)	17.213
GW-366 (P5)	17.2933
HI-1544 (P6)	23.1013
GW-173 (P7)	14.475
GW-11 (P8)	16.644
HD-2864 (P9)	16.5357
USA-385 (P10)	15.5507

## Sheet: E2
			HETEROBELTIOSIS															STANDARD HETEROSIS									SH1					SH2
	F 1		BP1	BP2		BP1 d	BP2 d	Final		BP1 %	BP2 %	Final	0.01	0.05	sign	final		CH1	CH2		SH1d	SH2 d		SH 1 %	SH 2 %		0.01	0.05	sign	final		0.01	0.05	sign	final
GW 451 x GW-496	16.05		20.2767	21.1191		-4.22665	-5.06908	-5.06908		-20.8449	-24.0024	-24.0024	3.07	4.05	NS	**		21.4	27.6		-5.35	-11.55		-25	-41.8478		3.07	4.05	NS	**		3.07	4.05	NS	**
GW 451 x LOK-1	20.1933		20.2767	26.761		-0.08332	-6.56762	-6.56762		-0.410916	-24.5418	-24.5418	3.07	4.05	NS	**		21.4	27.6		-1.20667	-7.40667		-5.63863	-26.8357		3.07	4.05	NS	NS		3.07	4.05	NS	**
GW 451 x GW-322	22.9817		20.2767	24.3662		2.70501	-1.38452	-1.38452		13.3405	-5.68212	-5.68212	3.07	4.05	NS	NS		21.4	27.6		1.58167	-4.61833		7.39097	-16.7331		3.07	4.05	NS	NS		3.07	4.05	NS	**
GW 451 x GW-366	16.4067		20.2767	32.1778		-3.86999	-15.7711	-15.7711		-19.0859	-49.0124	-49.0124	3.07	4.05	NS	**		21.4	27.6		-4.99333	-11.1933		-23.3333	-40.5556		3.07	4.05	NS	**		3.07	4.05	NS	**
GW 451 x HI-1544	18.1267		20.2767	24.7112		-2.14999	-6.58455	-6.58455		-10.6033	-26.646	-26.646	3.07	4.05	NS	**		21.4	27.6		-3.27333	-9.47333		-15.296	-34.3237		3.07	4.05	NS	*		3.07	4.05	NS	**
GW 451 x GW-173	23.8067		20.2767	18.97		3.53001	4.83671	3.53001		17.4093	25.4967	17.4093	3.07	4.05	*	*		21.4	27.6		2.40667	-3.79333		11.2461	-13.744		3.07	4.05	NS	NS		3.07	4.05	NS	*
GW 451 x GW-11	13.61		20.2767	16.6569		-6.66665	-3.04693	-6.66665		-32.8785	-18.2923	-32.8785	3.07	4.05	NS	**		21.4	27.6		-7.79	-13.99		-36.4019	-50.6884		3.07	4.05	NS	**		3.07	4.05	NS	**
GW 451 x HD-2864	32.1367		20.2767	20.0993		11.86	12.0374	11.86		58.491	59.8894	58.491	3.07	4.05	**	**		21.4	27.6		10.7367	4.53667		50.1713	16.4372		3.07	4.05	**	**		3.07	4.05	**	**
GW 451 x USA-385	25.8567		20.2767	16.4293		5.58001	9.42733	5.58001		27.5194	57.3811	27.5194	3.07	4.05	**	**		21.4	27.6		4.45667	-1.74333		20.8255	-6.31643		3.07	4.05	**	**		3.07	4.05	NS	NS
GW-496 x LOK-1	12.7733		21.1191	26.761		-8.34575	-13.9876	-13.9876		-39.5176	-52.2688	-52.2688	3.07	4.05	NS	**		21.4	27.6		-8.62667	-14.8267		-40.3115	-53.7198		3.07	4.05	NS	**		3.07	4.05	NS	**
GW-496 x GW-322	21.5867		21.1191	24.3662		0.467587	-2.77952	-2.77952		2.21405	-11.4073	-11.4073	3.07	4.05	NS	NS		21.4	27.6		0.186667	-6.01333		0.872274	-21.7874		3.07	4.05	NS	NS		3.07	4.05	NS	**
GW-496 x GW-366	20.3467		21.1191	32.1778		-0.772413	-11.8311	-11.8311		-3.65742	-36.768	-36.768	3.07	4.05	NS	**		21.4	27.6		-1.05333	-7.25333		-4.92212	-26.2802		3.07	4.05	NS	NS		3.07	4.05	NS	**
GW-496 x HI-1544	19.3267		21.1191	24.7112		-1.79241	-5.38455	-5.38455		-8.48718	-21.7899	-21.7899	3.07	4.05	NS	**		21.4	27.6		-2.07333	-8.27333		-9.68847	-29.9758		3.07	4.05	NS	NS		3.07	4.05	NS	**
GW-496 x GW-173	13.35		21.1191	18.97		-7.76908	-5.61995	-7.76908		-36.787	-29.6255	-36.787	3.07	4.05	NS	**		21.4	27.6		-8.05	-14.25		-37.6168	-51.6304		3.07	4.05	NS	**		3.07	4.05	NS	**
GW-496 x GW-11	22.2493		21.1191	16.6569		1.13025	5.5924	1.13025		5.35181	33.574	5.35181	3.07	4.05	NS	NS		21.4	27.6		0.849333	-5.35067		3.96885	-19.3865		3.07	4.05	NS	NS		3.07	4.05	NS	**
GW-496 x HD-2864	15.5933		21.1191	20.0993		-5.52575	-4.50598	-5.52575		-26.1647	-22.4186	-26.1647	3.07	4.05	NS	**		21.4	27.6		-5.80667	-12.0067		-27.134	-43.5024		3.07	4.05	NS	**		3.07	4.05	NS	**
GW-496 x USA-385	15.9643		21.1191	16.4293		-5.15475	-0.465	-5.15475		-24.408	-2.8303	-24.408	3.07	4.05	NS	**		21.4	27.6		-5.43567	-11.6357		-25.4003	-42.1582		3.07	4.05	NS	**		3.07	4.05	NS	**
LOK-1 x GW-322	13.7893		26.761	24.3662		-12.9716	-10.5769	-12.9716		-48.4722	-43.4079	-48.4722	3.07	4.05	NS	**		21.4	27.6		-7.61067	-13.8107		-35.5639	-50.0386		3.07	4.05	NS	**		3.07	4.05	NS	**
LOK-1 x GW-366	13.1613		26.761	32.1778		-13.5996	-19.0164	-19.0164		-50.8189	-59.0981	-59.0981	3.07	4.05	NS	**		21.4	27.6		-8.23867	-14.4387		-38.4984	-52.314		3.07	4.05	NS	**		3.07	4.05	NS	**
LOK-1 x HI-1544	16.963		26.761	24.7112		-9.79795	-7.74822	-9.79795		-36.6129	-31.3551	-36.6129	3.07	4.05	NS	**		21.4	27.6		-4.437	-10.637		-20.7336	-38.5399		3.07	4.05	NS	**		3.07	4.05	NS	**
LOK-1 x GW-173	16.2353		26.761	18.97		-10.5256	-2.73462	-10.5256		-39.332	-14.4155	-39.332	3.07	4.05	NS	**		21.4	27.6		-5.16467	-11.3647		-24.134	-41.1763		3.07	4.05	NS	**		3.07	4.05	NS	**
LOK-1 x GW-11	10.506		26.761	16.6569		-16.255	-6.15093	-16.255		-60.7413	-36.9272	-60.7413	3.07	4.05	NS	**		21.4	27.6		-10.894	-17.094		-50.9065	-61.9348		3.07	4.05	NS	**		3.07	4.05	NS	**
LOK-1 x HD-2864	23.2837		26.761	20.0993		-3.47729	3.18436	-3.47729		-12.9939	15.8431	-12.9939	3.07	4.05	NS	*		21.4	27.6		1.88367	-4.31633		8.80218	-15.6389		3.07	4.05	NS	NS		3.07	4.05	NS	**
LOK-1 x USA-385	35.4467		26.761	16.4293		8.68571	19.0173	8.68571		32.4567	115.752	32.4567	3.07	4.05	**	**		21.4	27.6		14.0467	7.84667		65.6386	28.43		3.07	4.05	**	**		3.07	4.05	**	**
GW-322 x GW-366	13.7667		24.3662	32.1778		-10.5995	-18.4111	-18.4111		-43.5009	-57.2169	-57.2169	3.07	4.05	NS	**		21.4	27.6		-7.63333	-13.8333		-35.6698	-50.1208		3.07	4.05	NS	**		3.07	4.05	NS	**
GW-322 x HI-1544	16.2367		24.3662	24.7112		-8.12952	-8.47455	-8.47455		-33.3639	-34.2944	-34.2944	3.07	4.05	NS	**		21.4	27.6		-5.16333	-11.3633		-24.1277	-41.1715		3.07	4.05	NS	**		3.07	4.05	NS	**
GW-322 x GW-173	9.36		24.3662	18.97		-15.0062	-9.60995	-15.0062		-61.5861	-50.6588	-61.5861	3.07	4.05	NS	**		21.4	27.6		-12.04	-18.24		-56.2617	-66.087		3.07	4.05	NS	**		3.07	4.05	NS	**
GW-322 x GW-11	14.4397		24.3662	16.6569		-9.92652	-2.21726	-9.92652		-40.7389	-13.3114	-40.7389	3.07	4.05	NS	**		21.4	27.6		-6.96033	-13.1603		-32.5249	-47.6824		3.07	4.05	NS	**		3.07	4.05	NS	**
GW-322 x HD-2864	17.5333		24.3662	20.0993		-6.83285	-2.56598	-6.83285		-28.0423	-12.7665	-28.0423	3.07	4.05	NS	**		21.4	27.6		-3.86667	-10.0667		-18.0685	-36.4734		3.07	4.05	NS	*		3.07	4.05	NS	**
GW-322 x USA-385	20.2967		24.3662	16.4293		-4.06952	3.86733	-4.06952		-16.7015	23.5392	-16.7015	3.07	4.05	NS	**		21.4	27.6		-1.10333	-7.30333		-5.15576	-26.4614		3.07	4.05	NS	NS		3.07	4.05	NS	**
GW-366 x HI-1544	12.0667		32.1778	24.7112		-20.1111	-12.6446	-20.1111		-62.5	-51.1693	-62.5	3.07	4.05	NS	**		21.4	27.6		-9.33333	-15.5333		-43.6137	-56.2802		3.07	4.05	NS	**		3.07	4.05	NS	**
GW-366 x GW-173	17.1133		32.1778	18.97		-15.0644	-1.85662	-15.0644		-46.8163	-9.78716	-46.8163	3.07	4.05	NS	**		21.4	27.6		-4.28667	-10.4867		-20.0312	-37.9952		3.07	4.05	NS	**		3.07	4.05	NS	**
GW-366 x GW-11	17.37		32.1778	16.6569		-14.8078	0.71307	-14.8078		-46.0187	4.28092	-46.0187	3.07	4.05	NS	**		21.4	27.6		-4.03	-10.23		-18.8318	-37.0652		3.07	4.05	NS	*		3.07	4.05	NS	**
GW-366 x HD-2864	23.2677		32.1778	20.0993		-8.91011	3.16836	-8.91011		-27.6903	15.7635	-27.6903	3.07	4.05	NS	**		21.4	27.6		1.86767	-4.33233		8.72741	-15.6969		3.07	4.05	NS	NS		3.07	4.05	NS	**
GW-366 x USA-385	14.8567		32.1778	16.4293		-17.3211	-1.57267	-17.3211		-53.8294	-9.57231	-53.8294	3.07	4.05	NS	**		21.4	27.6		-6.54333	-12.7433		-30.5763	-46.1715		3.07	4.05	NS	**		3.07	4.05	NS	**
HI-1544 x GW-173	22.3443		24.7112	18.97		-2.36689	3.37438	-2.36689		-9.57819	17.788	-9.57819	3.07	4.05	NS	NS		21.4	27.6		0.944333	-5.25567		4.41277	-19.0423		3.07	4.05	NS	NS		3.07	4.05	NS	**
HI-1544 x GW-11	17.896		24.7112	16.6569		-6.81522	1.23907	-6.81522		-27.5795	7.43877	-27.5795	3.07	4.05	NS	**		21.4	27.6		-3.504	-9.704		-16.3738	-35.1594		3.07	4.05	NS	*		3.07	4.05	NS	**
HI-1544 x HD-2864	17.3333		24.7112	20.0993		-7.37789	-2.76598	-7.37789		-29.8564	-13.7616	-29.8564	3.07	4.05	NS	**		21.4	27.6		-4.06667	-10.2667		-19.0031	-37.1981		3.07	4.05	NS	**		3.07	4.05	NS	**
HI-1544 x USA-385	14.546		24.7112	16.4293		-10.1652	-1.88333	-10.1652		-41.1361	-11.4632	-41.1361	3.07	4.05	NS	**		21.4	27.6		-6.854	-13.054		-32.028	-47.2971		3.07	4.05	NS	**		3.07	4.05	NS	**
GW-173 x GW-11	14.1553		18.97	16.6569		-4.81462	-2.5016	-4.81462		-25.3802	-15.0184	-25.3802	3.07	4.05	NS	**		21.4	27.6		-7.24467	-13.4447		-33.8536	-48.7126		3.07	4.05	NS	**		3.07	4.05	NS	**
GW-173 x HD-2864	15.2167		18.97	20.0993		-3.75329	-4.88264	-4.88264		-19.7854	-24.2926	-24.2926	3.07	4.05	NS	**		21.4	27.6		-6.18333	-12.3833		-28.8941	-44.8671		3.07	4.05	NS	**		3.07	4.05	NS	**
GW-173 x USA-385	10.0103		18.97	16.4293		-8.95962	-6.419	-8.95962		-47.2306	-39.0704	-47.2306	3.07	4.05	NS	**		21.4	27.6		-11.3897	-17.5897		-53.2227	-63.7307		3.07	4.05	NS	**		3.07	4.05	NS	**
GW-11 x HD-2864	15.1633		16.6569	20.0993		-1.4936	-4.93598	-4.93598		-8.96682	-24.5579	-24.5579	3.07	4.05	NS	**		21.4	27.6		-6.23667	-12.4367		-29.1433	-45.0604		3.07	4.05	NS	**		3.07	4.05	NS	**
GW-11 x USA-385	13.9267		16.6569	16.4293		-2.73026	-2.50267	-2.73026		-16.3912	-15.2329	-16.3912	3.07	4.05	NS	NS		21.4	27.6		-7.47333	-13.6733		-34.9221	-49.5411		3.07	4.05	NS	**		3.07	4.05	NS	**
HD-2864 x USA-385	20.21		20.0993	16.4293		0.11069	3.78067	0.11069		0.550715	23.0117	0.550715	3.07	4.05	NS	NS		21.4	27.6		-1.19	-7.39		-5.56075	-26.7754		3.07	4.05	NS	NS		3.07	4.05	NS	**
											max	58.491											max	65.6386	28.43
											min	-62.5											min	-56.2617	-66.087
GW - 451 (P1)	20.2767
GW - 496 (P2)	21.1191
LOK-1 (P3)	26.761
GW-322 (P4)	24.3662
GW-366 (P5)	32.1778
HI-1544 (P6)	24.7112
GW-173 (P7)	18.97
GW-11 (P8)	16.6569
HD-2864 (P9)	20.0993
USA-385 (P10)	16.4293
