# Supplementary material for: Combining ability, heterosis and performance of grain yield and content of Fe, Zn and protein in bread wheat under normal and late sowing conditions
Source: PeerJ. 2023 Mar 9;11:e14971. doi: 10.7717/peerj.14971 (PMC10008312; doi:10.7717/peerj.14971)
Supplement: Supplemental Information 8 [file peerj-11-14971-s008.xlsx]

## Sheet: E1 
			HETEROBELTIOSIS															STANDARD HETEROSIS									SH1					SH2
	F 1		BP1	BP2		BP1 d	BP2 d	Final		BP1 %	BP2 %	Final	0.01	0.05	sign	final		CH1	CH2		SH1d	SH2 d		SH 1 %	SH 2 %		0.01	0.05	sign	final		0.01	0.05	sign	final
GW 451 x GW-496	25.8879		22.181	28.7259		3.70693	-2.83803	-2.83803		16.7122	-9.87966	-9.87966	1.09	1.44	NS	**		25.8	18.5		0.0879118	7.38791		0.340744	39.9347		1.09	1.44	NS	NS		1.09	1.44	**	NS
GW 451 x LOK-1	21.6628		22.181	27.7838		-0.518128	-6.12098	-6.12098		-2.33591	-22.0307	-22.0307	1.09	1.44	NS	**		25.8	18.5		-4.13715	3.16285		-16.0355	17.0965		1.09	1.44	NS	**		1.09	1.44	**	NS
GW 451 x GW-322	24.3557		22.181	23.5752		2.17475	0.780543	0.780543		9.80459	3.31087	3.31087	1.09	1.44	NS	NS		25.8	18.5		-1.44427	5.85573		-5.59794	31.6526		1.09	1.44	NS	**		1.09	1.44	**	NS
GW 451 x GW-366	24.2394		22.181	22.9126		2.05838	1.32677	1.32677		9.27994	5.79055	5.79055	1.09	1.44	*	*		25.8	18.5		-1.56064	5.73936		-6.049	31.0236		1.09	1.44	NS	**		1.09	1.44	**	NS
GW 451 x HI-1544	29.0923		22.181	25.4078		6.91132	3.68453	3.68453		31.1588	14.5016	14.5016	1.09	1.44	**	**		25.8	18.5		3.2923	10.5923		12.7609	57.2557		1.09	1.44	**	**		1.09	1.44	**	NS
GW 451 x GW-173	23.2272		22.181	28.6969		1.04623	-5.46965	-5.46965		4.71679	-19.0601	-19.0601	1.09	1.44	NS	**		25.8	18.5		-2.57279	4.72721		-9.97207	25.5525		1.09	1.44	NS	**		1.09	1.44	**	NS
GW 451 x GW-11	27.0884		22.181	31.3533		4.90742	-4.26493	-4.26493		22.1245	-13.6028	-13.6028	1.09	1.44	NS	**		25.8	18.5		1.2884	8.5884		4.99379	46.4238		1.09	1.44	*	*		1.09	1.44	**	NS
GW 451 x HD-2864	29.9667		22.181	34.438		7.78569	-4.47131	-4.47131		35.1008	-12.9837	-12.9837	1.09	1.44	NS	**		25.8	18.5		4.16667	11.4667		16.1499	61.982		1.09	1.44	**	**		1.09	1.44	**	NS
GW 451 x USA-385	26.3496		22.181	23.1833		4.1686	3.16624	3.16624		18.7936	13.6574	13.6574	1.09	1.44	**	**		25.8	18.5		0.549577	7.84958		2.13014	42.4301		1.09	1.44	NS	NS		1.09	1.44	**	NS
GW-496 x LOK-1	23.7083		28.7259	27.7838		-5.01762	-4.07551	-5.01762		-17.4672	-14.6686	-17.4672	1.09	1.44	NS	**		25.8	18.5		-2.09168	5.20832		-8.10728	28.1531		1.09	1.44	NS	**		1.09	1.44	**	NS
GW-496 x GW-322	27.2015		28.7259	23.5752		-1.52439	3.62636	-1.52439		-5.30667	15.3821	-5.30667	1.09	1.44	NS	**		25.8	18.5		1.40155	8.70155		5.43235	47.0354		1.09	1.44	*	*		1.09	1.44	**	NS
GW-496 x GW-366	23.1664		28.7259	22.9126		-5.55954	0.253809	-5.55954		-19.3537	1.10773	-19.3537	1.09	1.44	NS	**		25.8	18.5		-2.6336	4.6664		-10.2077	25.2238		1.09	1.44	NS	**		1.09	1.44	**	NS
GW-496 x HI-1544	21.8763		28.7259	25.4078		-6.84964	-3.53147	-6.84964		-23.8448	-13.8992	-23.8448	1.09	1.44	NS	**		25.8	18.5		-3.9237	3.3763		-15.2081	18.2503		1.09	1.44	NS	**		1.09	1.44	**	NS
GW-496 x GW-173	41.547		28.7259	28.6969		12.8211	12.8502	12.8211		44.6324	44.779	44.6324	1.09	1.44	**	**		25.8	18.5		15.747	23.047		61.035	124.579		1.09	1.44	**	**		1.09	1.44	**	NS
GW-496 x GW-11	25.2217		28.7259	31.3533		-3.50426	-6.13165	-6.13165		-12.1989	-19.5566	-19.5566	1.09	1.44	NS	**		25.8	18.5		-0.578321	6.72168		-2.24156	36.3334		1.09	1.44	NS	NS		1.09	1.44	**	NS
GW-496 x HD-2864	24.9452		28.7259	34.438		-3.78077	-9.49281	-9.49281		-13.1615	-27.5649	-27.5649	1.09	1.44	NS	**		25.8	18.5		-0.854831	6.44517		-3.3133	34.8388		1.09	1.44	NS	NS		1.09	1.44	**	NS
GW-496 x USA-385	27.7707		28.7259	23.1833		-0.955236	4.58736	-0.955236		-3.32534	19.7873	-3.32534	1.09	1.44	NS	NS		25.8	18.5		1.9707	9.2707		7.63838	50.1119		1.09	1.44	**	**		1.09	1.44	**	NS
LOK-1 x GW-322	26.2094		27.7838	23.5752		-1.57445	2.63419	-1.57445		-5.66679	11.1736	-5.66679	1.09	1.44	NS	**		25.8	18.5		0.409382	7.70938		1.58675	41.6723		1.09	1.44	NS	NS		1.09	1.44	**	NS
LOK-1 x GW-366	27.2117		27.7838	22.9126		-0.57214	4.2991	-0.57214		-2.05925	18.763	-2.05925	1.09	1.44	NS	NS		25.8	18.5		1.41169	8.71169		5.47168	47.0902		1.09	1.44	*	*		1.09	1.44	**	NS
LOK-1 x HI-1544	30.5067		27.7838	25.4078		2.72283	5.0989	2.72283		9.80007	20.0683	9.80007	1.09	1.44	**	**		25.8	18.5		4.70667	12.0067		18.2429	64.9009		1.09	1.44	**	**		1.09	1.44	**	NS
LOK-1 x GW-173	28.7639		27.7838	28.6969		0.980031	0.0670023	0.0670023		3.52734	0.233483	0.233483	1.09	1.44	NS	NS		25.8	18.5		2.96386	10.2639		11.4878	55.4803		1.09	1.44	**	**		1.09	1.44	**	NS
LOK-1 x GW-11	25.2395		27.7838	31.3533		-2.54432	-6.11382	-6.11382		-9.15756	-19.4998	-19.4998	1.09	1.44	NS	**		25.8	18.5		-0.56049	6.73951		-2.17244	36.4298		1.09	1.44	NS	NS		1.09	1.44	**	NS
LOK-1 x HD-2864	25.6432		27.7838	34.438		-2.14067	-8.79482	-8.79482		-7.70474	-25.5381	-25.5381	1.09	1.44	NS	**		25.8	18.5		-0.156838	7.14316		-0.6079	38.6117		1.09	1.44	NS	NS		1.09	1.44	**	*
LOK-1 x USA-385	25.1244		27.7838	23.1833		-2.6594	1.94109	-2.6594		-9.57177	8.37277	-9.57177	1.09	1.44	NS	**		25.8	18.5		-0.675572	6.62443		-2.6185	35.8077		1.09	1.44	NS	NS		1.09	1.44	**	NS
GW-322 x GW-366	26.2655		23.5752	22.9126		2.69031	3.3529	2.69031		11.4116	14.6335	11.4116	1.09	1.44	**	**		25.8	18.5		0.465497	7.7655		1.80425	41.9757		1.09	1.44	NS	NS		1.09	1.44	**	NS
GW-322 x HI-1544	24.4889		23.5752	25.4078		0.913725	-0.918857	-0.918857		3.87579	-3.61644	-3.61644	1.09	1.44	NS	NS		25.8	18.5		-1.31109	5.98891		-5.08173	32.3725		1.09	1.44	NS	*		1.09	1.44	**	NS
GW-322 x GW-173	25.2182		23.5752	28.6969		1.64297	-3.4787	-3.4787		6.96906	-12.1222	-12.1222	1.09	1.44	NS	**		25.8	18.5		-0.581843	6.71816		-2.25521	36.3144		1.09	1.44	NS	NS		1.09	1.44	**	NS
GW-322 x GW-11	28.07		23.5752	31.3533		4.49481	-3.28333	-3.28333		19.0659	-10.472	-10.472	1.09	1.44	NS	**		25.8	18.5		2.27	9.57		8.79845	51.7297		1.09	1.44	**	**		1.09	1.44	**	NS
GW-322 x HD-2864	24.5434		23.5752	34.438		0.968163	-9.89463	-9.89463		4.1067	-28.7317	-28.7317	1.09	1.44	NS	**		25.8	18.5		-1.25665	6.04335		-4.87073	32.6668		1.09	1.44	NS	*		1.09	1.44	**	NS
GW-322 x USA-385	27.8467		23.5752	23.1833		4.27148	4.66333	4.27148		18.1185	20.115	18.1185	1.09	1.44	**	**		25.8	18.5		2.04667	9.34667		7.93282	50.5225		1.09	1.44	**	**		1.09	1.44	**	NS
GW-366 x HI-1544	25.0152		22.9126	25.4078		2.1026	-0.392575	-0.392575		9.17662	-1.5451	-1.5451	1.09	1.44	NS	NS		25.8	18.5		-0.784805	6.51519		-3.04188	35.2173		1.09	1.44	NS	NS		1.09	1.44	**	NS
GW-366 x GW-173	31.8067		22.9126	28.6969		8.89407	3.10981	3.10981		38.8174	10.8367	10.8367	1.09	1.44	**	**		25.8	18.5		6.00667	13.3067		23.2817	71.9279		1.09	1.44	**	**		1.09	1.44	**	NS
GW-366 x GW-11	23.0587		22.9126	31.3533		0.146142	-8.2946	-8.2946		0.637825	-26.4552	-26.4552	1.09	1.44	NS	**		25.8	18.5		-2.74127	4.55873		-10.6251	24.6418		1.09	1.44	NS	**		1.09	1.44	**	NS
GW-366 x HD-2864	22.7792		22.9126	34.438		-0.133349	-11.6587	-11.6587		-0.58199	-33.8543	-33.8543	1.09	1.44	NS	**		25.8	18.5		-3.02076	4.27924		-11.7084	23.131		1.09	1.44	NS	**		1.09	1.44	**	NS
GW-366 x USA-385	25.18		22.9126	23.1833		2.26741	1.99666	1.99666		9.8959	8.61248	8.61248	1.09	1.44	**	**		25.8	18.5		-0.62	6.68		-2.4031	36.1081		1.09	1.44	NS	**		1.09	1.44	**	NS
HI-1544 x GW-173	30.8433		25.4078	28.6969		5.43556	2.14647	2.14647		21.3933	7.47982	7.47982	1.09	1.44	**	**		25.8	18.5		5.04333	12.3433		19.5478	66.7207		1.09	1.44	**	**		1.09	1.44	**	NS
HI-1544 x GW-11	24.9832		25.4078	31.3533		-0.424529	-6.37009	-6.37009		-1.67086	-20.3171	-20.3171	1.09	1.44	NS	**		25.8	18.5		-0.816759	6.48324		-3.16573	35.0445		1.09	1.44	NS	NS		1.09	1.44	**	NS
HI-1544 x HD-2864	28.1		25.4078	34.438		2.69223	-6.33798	-6.33798		10.5961	-18.404	-18.404	1.09	1.44	NS	**		25.8	18.5		2.3	9.6		8.91473	51.8919		1.09	1.44	**	**		1.09	1.44	**	NS
HI-1544 x USA-385	25.6911		25.4078	23.1833		0.283308	2.50774	0.283308		1.11504	10.817	1.11504	1.09	1.44	NS	NS		25.8	18.5		-0.108922	7.19108		-0.42218	38.8707		1.09	1.44	NS	NS		1.09	1.44	**	NS
GW-173 x GW-11	23.2768		28.6969	31.3533		-5.42008	-8.07655	-8.07655		-18.8874	-25.7598	-25.7598	1.09	1.44	NS	**		25.8	18.5		-2.52322	4.77678		-9.77993	25.8204		1.09	1.44	NS	**		1.09	1.44	**	NS
GW-173 x HD-2864	22.4159		28.6969	34.438		-6.28093	-12.0221	-12.0221		-21.8872	-34.9093	-34.9093	1.09	1.44	NS	**		25.8	18.5		-3.38407	3.91593		-13.1166	21.1672		1.09	1.44	NS	**		1.09	1.44	**	NS
GW-173 x USA-385	25.8056		28.6969	23.1833		-2.89127	2.62225	-2.89127		-10.0752	11.3109	-10.0752	1.09	1.44	NS	**		25.8	18.5		0.00558851	7.30559		0.0216609	39.4897		1.09	1.44	NS	NS		1.09	1.44	**	NS
GW-11 x HD-2864	25.2587		31.3533	34.438		-6.0946	-9.17925	-9.17925		-19.4385	-26.6544	-26.6544	1.09	1.44	NS	**		25.8	18.5		-0.541271	6.75873		-2.09795	36.5337		1.09	1.44	NS	NS		1.09	1.44	**	NS
GW-11 x USA-385	24.9425		31.3533	23.1833		-6.41088	1.75911	-6.41088		-20.4472	7.58784	-20.4472	1.09	1.44	NS	**		25.8	18.5		-0.857547	6.44245		-3.32382	34.8241		1.09	1.44	NS	NS		1.09	1.44	**	NS
HD-2864 x USA-385	24.3761		34.438	23.1833		-10.0619	1.19279	-10.0619		-29.2173	5.14503	-29.2173	1.09	1.44	NS	**		25.8	18.5		-1.42387	5.87613		-5.51888	31.7629		1.09	1.44	NS	*		1.09	1.44	**	NS
											max	44.6324											max	61.035	124.579
											min	-34.9093											min	-16.0355	17.0965
GW - 451 (P1)	22.181
GW - 496 (P2)	28.7259
LOK-1 (P3)	27.7838
GW-322 (P4)	23.5752
GW-366 (P5)	22.9126
HI-1544 (P6)	25.4078
GW-173 (P7)	28.6969
GW-11 (P8)	31.3533
HD-2864 (P9)	34.438
USA-385 (P10)	23.1833

## Sheet: E2
			HETEROBELTIOSIS															STANDARD HETEROSIS									SH1					SH2
	F 1		BP1	BP2		BP1 d	BP2 d	Final		BP1 %	BP2 %	Final	0.01	0.05	sign	final		CH1	CH2		SH1d	SH2 d		SH 1 %	SH 2 %		0.01	0.05	sign	final		0.01	0.05	sign	final
GW 451 x GW-496	27.3		24.77	26.2833		2.53	1.01667	1.01667		10.214	3.8681	3.8681	1.27	1.67	NS	NS		27.3	26.7		0	0.6		0	2.24719		1.27	1.67	NS	NS		1.27	1.67	NS	NS
GW 451 x LOK-1	29.5733		24.77	28.1767		4.80333	1.39667	1.39667		19.3917	4.95682	4.95682	1.27	1.67	*	*		27.3	26.7		2.27333	2.87333		8.32723	10.7615		1.27	1.67	**	**		1.27	1.67	**	**
GW 451 x GW-322	33.5367		24.77	24.1967		8.76667	9.34	8.76667		35.3923	38.6004	35.3923	1.27	1.67	**	**		27.3	26.7		6.23667	6.83667		22.8449	25.6055		1.27	1.67	**	**		1.27	1.67	**	**
GW 451 x GW-366	30.06		24.77	33.2667		5.29	-3.20667	-3.20667		21.3565	-9.63928	-9.63928	1.27	1.67	NS	**		27.3	26.7		2.76	3.36		10.1099	12.5843		1.27	1.67	**	**		1.27	1.67	**	**
GW 451 x HI-1544	32.1767		24.77	27.25		7.40667	4.92667	4.92667		29.9018	18.0795	18.0795	1.27	1.67	**	**		27.3	26.7		4.87667	5.47667		17.8632	20.5119		1.27	1.67	**	**		1.27	1.67	**	**
GW 451 x GW-173	31.0033		24.77	31.28		6.23333	-0.276667	-0.276667		25.1648	-0.884484	-0.884484	1.27	1.67	NS	NS		27.3	26.7		3.70333	4.30333		13.5653	16.1174		1.27	1.67	**	**		1.27	1.67	**	**
GW 451 x GW-11	31.19		24.77	28.8133		6.42	2.37667	2.37667		25.9184	8.2485	8.2485	1.27	1.67	**	**		27.3	26.7		3.89	4.49		14.2491	16.8165		1.27	1.67	**	**		1.27	1.67	**	**
GW 451 x HD-2864	35.5233		24.77	33.1733		10.7533	2.35	2.35		43.4127	7.084	7.084	1.27	1.67	**	**		27.3	26.7		8.22333	8.82333		30.1221	33.0462		1.27	1.67	**	**		1.27	1.67	**	**
GW 451 x USA-385	34.9133		24.77	31.2533		10.1433	3.66	3.66		40.9501	11.7108	11.7108	1.27	1.67	**	**		27.3	26.7		7.61333	8.21333		27.8877	30.7615		1.27	1.67	**	**		1.27	1.67	**	**
GW-496 x LOK-1	33.65		26.2833	28.1767		7.36667	5.47333	5.47333		28.0279	19.4251	19.4251	1.27	1.67	**	**		27.3	26.7		6.35	6.95		23.2601	26.03		1.27	1.67	**	**		1.27	1.67	**	**
GW-496 x GW-322	26.26		26.2833	24.1967		-0.0233333	2.06333	-0.0233333		-0.0887762	8.52735	-0.0887762	1.27	1.67	NS	NS		27.3	26.7		-1.04	-0.44		-3.80952	-1.64794		1.27	1.67	NS	NS		1.27	1.67	NS	NS
GW-496 x GW-366	26.02		26.2833	33.2667		-0.263333	-7.24667	-7.24667		-1.0019	-21.7836	-21.7836	1.27	1.67	NS	**		27.3	26.7		-1.28	-0.68		-4.68864	-2.54682		1.27	1.67	NS	*		1.27	1.67	NS	NS
GW-496 x HI-1544	30.03		26.2833	27.25		3.74667	2.78	2.78		14.2549	10.2018	10.2018	1.27	1.67	**	**		27.3	26.7		2.73	3.33		10	12.4719		1.27	1.67	**	**		1.27	1.67	**	**
GW-496 x GW-173	26.86		26.2833	31.28		0.576667	-4.42	-4.42		2.19404	-14.1304	-14.1304	1.27	1.67	NS	**		27.3	26.7		-0.44	0.16		-1.61172	0.599251		1.27	1.67	NS	NS		1.27	1.67	NS	NS
GW-496 x GW-11	28.2967		26.2833	28.8133		2.01333	-0.516667	-0.516667		7.66011	-1.79315	-1.79315	1.27	1.67	NS	NS		27.3	26.7		0.996667	1.59667		3.65079	5.98002		1.27	1.67	NS	NS		1.27	1.67	*	*
GW-496 x HD-2864	32.2733		26.2833	33.1733		5.99	-0.9	-0.9		22.7901	-2.71302	-2.71302	1.27	1.67	NS	NS		27.3	26.7		4.97333	5.57333		18.2173	20.8739		1.27	1.67	**	**		1.27	1.67	**	**
GW-496 x USA-385	26.88		26.2833	31.2533		0.596667	-4.37333	-4.37333		2.27013	-13.9932	-13.9932	1.27	1.67	NS	**		27.3	26.7		-0.42	0.18		-1.53846	0.674157		1.27	1.67	NS	NS		1.27	1.67	NS	NS
LOK-1 x GW-322	26.9333		28.1767	24.1967		-1.24333	2.73667	-1.24333		-4.41263	11.3101	-4.41263	1.27	1.67	NS	NS		27.3	26.7		-0.366667	0.233333		-1.3431	0.873908		1.27	1.67	NS	NS		1.27	1.67	NS	NS
LOK-1 x GW-366	25.9333		28.1767	33.2667		-2.24333	-7.33333	-7.33333		-7.96167	-22.0441	-22.0441	1.27	1.67	NS	**		27.3	26.7		-1.36667	-0.766667		-5.00611	-2.87141		1.27	1.67	NS	*		1.27	1.67	NS	NS
LOK-1 x HI-1544	27.2167		28.1767	27.25		-0.96	-0.0333333	-0.96		-3.40707	-0.122324	-3.40707	1.27	1.67	NS	NS		27.3	26.7		-0.0833333	0.516667		-0.30525	1.93508		1.27	1.67	NS	NS		1.27	1.67	NS	NS
LOK-1 x GW-173	27.51		28.1767	31.28		-0.666667	-3.77	-3.77		-2.36602	-12.0524	-12.0524	1.27	1.67	NS	**		27.3	26.7		0.21	0.81		0.769231	3.03371		1.27	1.67	NS	NS		1.27	1.67	NS	NS
LOK-1 x GW-11	28.0333		28.1767	28.8133		-0.143333	-0.78	-0.78		-0.508695	-2.70708	-2.70708	1.27	1.67	NS	NS		27.3	26.7		0.733333	1.33333		2.6862	4.99376		1.27	1.67	NS	NS		1.27	1.67	*	*
LOK-1 x HD-2864	26.0933		28.1767	33.1733		-2.08333	-7.08	-7.08		-7.39382	-21.3424	-21.3424	1.27	1.67	NS	**		27.3	26.7		-1.20667	-0.606667		-4.42002	-2.27216		1.27	1.67	NS	NS		1.27	1.67	NS	NS
LOK-1 x USA-385	26.7267		28.1767	31.2533		-1.45	-4.52667	-4.52667		-5.1461	-14.4838	-14.4838	1.27	1.67	NS	**		27.3	26.7		-0.573333	0.0266667		-2.10012	0.0998752		1.27	1.67	NS	NS		1.27	1.67	NS	NS
GW-322 x GW-366	26.3133		24.1967	33.2667		2.11667	-6.95333	-6.95333		8.74776	-20.9018	-20.9018	1.27	1.67	NS	**		27.3	26.7		-0.986667	-0.386667		-3.61416	-1.44819		1.27	1.67	NS	NS		1.27	1.67	NS	NS
GW-322 x HI-1544	32.5367		24.1967	27.25		8.34	5.28667	5.28667		34.4676	19.4006	19.4006	1.27	1.67	**	**		27.3	26.7		5.23667	5.83667		19.1819	21.8602		1.27	1.67	**	**		1.27	1.67	**	**
GW-322 x GW-173	29.5633		24.1967	31.28		5.36667	-1.71667	-1.71667		22.1794	-5.48806	-5.48806	1.27	1.67	NS	**		27.3	26.7		2.26333	2.86333		8.2906	10.7241		1.27	1.67	**	**		1.27	1.67	**	**
GW-322 x GW-11	31.1433		24.1967	28.8133		6.94667	2.33	2.33		28.7092	8.08653	8.08653	1.27	1.67	**	**		27.3	26.7		3.84333	4.44333		14.0781	16.6417		1.27	1.67	**	**		1.27	1.67	**	**
GW-322 x HD-2864	31.5567		24.1967	33.1733		7.36	-1.61667	-1.61667		30.4174	-4.87339	-4.87339	1.27	1.67	NS	*		27.3	26.7		4.25667	4.85667		15.5922	18.1898		1.27	1.67	**	**		1.27	1.67	**	**
GW-322 x USA-385	29.1		24.1967	31.2533		4.90333	-2.15333	-2.15333		20.2645	-6.88993	-6.88993	1.27	1.67	NS	**		27.3	26.7		1.8	2.4		6.59341	8.98876		1.27	1.67	**	**		1.27	1.67	**	**
GW-366 x HI-1544	32.2967		33.2667	27.25		-0.97	5.04667	-0.97		-2.91583	18.5199	-2.91583	1.27	1.67	NS	NS		27.3	26.7		4.99667	5.59667		18.3028	20.9613		1.27	1.67	**	**		1.27	1.67	**	**
GW-366 x GW-173	31.78		33.2667	31.28		-1.48667	0.5	-1.48667		-4.46894	1.59847	-4.46894	1.27	1.67	NS	*		27.3	26.7		4.48	5.08		16.4103	19.0262		1.27	1.67	**	**		1.27	1.67	**	**
GW-366 x GW-11	26.2933		33.2667	28.8133		-6.97333	-2.52	-6.97333		-20.9619	-8.74595	-20.9619	1.27	1.67	NS	**		27.3	26.7		-1.00667	-0.406667		-3.68742	-1.5231		1.27	1.67	NS	NS		1.27	1.67	NS	NS
GW-366 x HD-2864	22.2633		33.2667	33.1733		-11.0033	-10.91	-11.0033		-33.0762	-32.8879	-33.0762	1.27	1.67	NS	**		27.3	26.7		-5.03667	-4.43667		-18.4493	-16.6167		1.27	1.67	NS	**		1.27	1.67	NS	**
GW-366 x USA-385	33.35		33.2667	31.2533		0.0833333	2.09667	0.0833333		0.250501	6.70862	0.250501	1.27	1.67	NS	NS		27.3	26.7		6.05	6.65		22.1612	24.9064		1.27	1.67	**	**		1.27	1.67	**	**
HI-1544 x GW-173	35.05		27.25	31.28		7.8	3.77	3.77		28.6239	12.0524	12.0524	1.27	1.67	**	**		27.3	26.7		7.75	8.35		28.3883	31.2734		1.27	1.67	**	**		1.27	1.67	**	**
HI-1544 x GW-11	36.04		27.25	28.8133		8.79	7.22667	7.22667		32.2569	25.081	25.081	1.27	1.67	**	**		27.3	26.7		8.74	9.34		32.0147	34.9813		1.27	1.67	**	**		1.27	1.67	**	**
HI-1544 x HD-2864	23.0267		27.25	33.1733		-4.22333	-10.1467	-10.1467		-15.4985	-30.5868	-30.5868	1.27	1.67	NS	**		27.3	26.7		-4.27333	-3.67333		-15.6532	-13.7578		1.27	1.67	NS	**		1.27	1.67	NS	**
HI-1544 x USA-385	28.0133		27.25	31.2533		0.763333	-3.24	-3.24		2.80122	-10.3669	-10.3669	1.27	1.67	NS	**		27.3	26.7		0.713333	1.31333		2.61294	4.91885		1.27	1.67	NS	NS		1.27	1.67	*	*
GW-173 x GW-11	28.7133		31.28	28.8133		-2.56667	-0.1	-2.56667		-8.20546	-0.347062	-8.20546	1.27	1.67	NS	**		27.3	26.7		1.41333	2.01333		5.17705	7.54057		1.27	1.67	*	*		1.27	1.67	**	**
GW-173 x HD-2864	28.41		31.28	33.1733		-2.87	-4.76333	-4.76333		-9.17519	-14.3589	-14.3589	1.27	1.67	NS	**		27.3	26.7		1.11	1.71		4.06593	6.40449		1.27	1.67	NS	NS		1.27	1.67	**	**
GW-173 x USA-385	29.3967		31.28	31.2533		-1.88333	-1.85667	-1.88333		-6.02089	-5.9407	-6.02089	1.27	1.67	NS	**		27.3	26.7		2.09667	2.69667		7.6801	10.0999		1.27	1.67	**	**		1.27	1.67	**	**
GW-11 x HD-2864	32.08		28.8133	33.1733		3.26667	-1.09333	-1.09333		11.3373	-3.29582	-3.29582	1.27	1.67	NS	NS		27.3	26.7		4.78	5.38		17.5092	20.1498		1.27	1.67	**	**		1.27	1.67	**	**
GW-11 x USA-385	26.9333		28.8133	31.2533		-1.88	-4.32	-4.32		-6.52476	-13.8225	-13.8225	1.27	1.67	NS	**		27.3	26.7		-0.366667	0.233333		-1.3431	0.873908		1.27	1.67	NS	NS		1.27	1.67	NS	NS
HD-2864 x USA-385	25.9067		33.1733	31.2533		-7.26667	-5.34667	-7.26667		-21.9051	-17.1075	-21.9051	1.27	1.67	NS	**		27.3	26.7		-1.39333	-0.793333		-5.10379	-2.97129		1.27	1.67	NS	*		1.27	1.67	NS	NS
											max	35.3923											max	32.0147	34.9813
											min	-33.0762											min	-18.4493	-16.6167
GW - 451 (P1)	24.77
GW - 496 (P2)	26.2833
LOK-1 (P3)	28.1767
GW-322 (P4)	24.1967
GW-366 (P5)	33.2667
HI-1544 (P6)	27.25
GW-173 (P7)	31.28
GW-11 (P8)	28.8133
HD-2864 (P9)	33.1733
USA-385 (P10)	31.2533
